# Supplementary material
Source: PubMed Central journal article supplement (PMC7456560)
Supplement: NIHMS1614500-supplement-SI.pdf [file NIHMS1614500-supplement-SI.pdf]

# Accelerated Discovery of Potent Fusion Inhibitors for Respiratory Syncytial Virus

## Supporting Information

Nicole Pribut<sup>1†</sup>, Thomas M. Kaiser<sup>1†</sup>, Robert J. Wilson<sup>1</sup>, Edgars Jecs<sup>1</sup>, Zackery W. Dentmon<sup>1</sup>, Stephen C. Pelly<sup>1</sup>, Savita Sharma<sup>1</sup>, Perry W. Bartsch III<sup>1</sup>, Pieter B. Burger<sup>1</sup>, Soyon S. Hwang<sup>1</sup>, Thalia Le<sup>1</sup>, Julien Sourimant<sup>2</sup>, Jeong-Joong Yoon<sup>2</sup>, Richard K. Plemper<sup>2‡</sup>, Dennis C. Liotta<sup>1\*</sup>

<sup>1</sup>Department of Chemistry, Emory University, 1515 Dickey Drive, Atlanta, Georgia 30322, United States

<sup>2</sup>Institute for Biomedical Sciences, Georgia State University, Atlanta, Georgia 30303, United States

\*Corresponding Author: To whom all contact regarding medicinal chemistry enquiries should be addressed. Email: [dliotta@emory.edu](mailto:dliotta@emory.edu)

## Contents

|                                                                                                    |    |
|----------------------------------------------------------------------------------------------------|----|
| <i>In Vitro</i> Protocols for Antiviral Activity Determination .....                               | 3  |
| Cells and viruses .....                                                                            | 3  |
| Dose-response luciferase reporter assays.....                                                      | 4  |
| Table S1.....                                                                                      | 4  |
| Table S2.....                                                                                      | 5  |
| <i>In Vitro</i> Protocols for Determination of Stability in Human Liver Microsomes .....           | 5  |
| Experimental details.....                                                                          | 5  |
| Instrumentation and method development .....                                                       | 6  |
| Table S3.....                                                                                      | 6  |
| General Synthetic Procedures.....                                                                  | 7  |
| Synthetic Procedures and Characterization .....                                                    | 8  |
| Tert-butyl thietan-3-ylcarbamate.....                                                              | 8  |
| Tert-butyl (1,1-dioxidothietan-3-yl)carbamate .....                                                | 8  |
| 3-Aminothietane 1,1-dioxide hydrochloride .....                                                    | 8  |
| 3-((3-Nitropyridin-4-yl)amino)thietane 1,1-dioxide (7).....                                        | 9  |
| 3-((3-Aminopyridin-4-yl)amino)thietane 1,1-dioxide (10).....                                       | 9  |
| 1-(1,1-Dioxidothietan-3-yl)-1,3-dihydro-2 <i>H</i> -imidazo[4,5- <i>c</i> ]pyridin-2-one (13)..... | 9  |
| 3-Nitro- <i>N</i> -tetrahydropyran-4-yl-pyridin-4-amine (8) .....                                  | 10 |
| <i>N</i> <sup>4</sup> -Tetrahydropyran-4-ylpyridine-3,4-diamine (11) .....                         | 10 |
| 3-Tetrahydropyran-4-yl-1 <i>H</i> -benzimidazol-2-one (14) .....                                   | 10 |
| <i>N</i> -(1,1-Dioxothian-4-yl)-3-nitro-pyridin-4-amine (9) .....                                  | 11 |
| <i>N</i> <sup>4</sup> -(1,1-Dioxothian-4-yl)pyridine-3,4-diamine (12) .....                        | 11 |
| 1-(1,1-Dioxothian-4-yl)-3 <i>H</i> -imidazo[4,5- <i>c</i> ]pyridin-2-one (15) .....                | 11 |
| 4-(2-(Hydroxymethyl)-1 <i>H</i> -benzo[ <i>d</i> ]imidazol-1-yl)butanenitrile (18).....            | 12 |
| 4-(2-(Chloromethyl)-1 <i>H</i> -benzo[ <i>d</i> ]imidazol-1-yl)butanenitrile (20) .....            | 12 |

|                                                                                                                                                                                            |    |
|--------------------------------------------------------------------------------------------------------------------------------------------------------------------------------------------|----|
| 1-(4-((tert-Butyldimethylsilyl)oxy)butyl)-1 <i>H</i> -benzo[d]imidazol-2-yl)methanol (19) .....                                                                                            | 13 |
| 1-(4-((tert-butyldimethylsilyl)oxy)butyl)-2-(chloromethyl)-1 <i>H</i> -benzo[d]imidazole (21) .....                                                                                        | 13 |
| 4-(2-((1-(1,1-dioxidothietan-3-yl)-2-oxo-1,2-dihydro-3 <i>H</i> -imidazo[4,5- <i>c</i> ]pyridin-3-yl)methyl)-1 <i>H</i> -benzo[d]imidazol-1-yl)butanenitrile (1) .....                     | 14 |
| 4-(2-((2-oxo-1-(tetrahydro-2 <i>H</i> -pyran-4-yl)-1,2-dihydro-3 <i>H</i> -imidazo[4,5- <i>c</i> ]pyridin-3-yl)methyl)-1 <i>H</i> -benzo[d]imidazol-1-yl)butanenitrile (2) .....           | 14 |
| 3-((1-(4-((Tert-butyldimethylsilyl)oxy)butyl)-1 <i>H</i> -benzo[d]imidazol-2-yl)methyl)-1-(1,1-dioxidothietan-3-yl)-1,3-dihydro-2 <i>H</i> -imidazo[4,5- <i>c</i> ]pyridin-2-one (16)..... | 15 |
| 1-(1,1-Dioxidothietan-3-yl)-3-((1-(4-hydroxybutyl)-1 <i>H</i> -benzo[d]imidazol-2-yl)methyl)-1,3-dihydro-2 <i>H</i> -imidazo[4,5- <i>c</i> ]pyridin-2-one (3) .....                        | 16 |
| 4-(2-((2'-oxospiro[cyclopropane-1,3'-pyrrolo[2,3- <i>c</i> ]pyridin]-1'(2' <i>H</i> )-yl)methyl)-1 <i>H</i> -benzo[d]imidazol-1-yl)butanenitrile (4) .....                                 | 16 |
| 1'-((1-(4-((tert-butyldimethylsilyl)oxy)butyl)-1 <i>H</i> -benzo[d]imidazol-2-yl)methyl)spiro [cyclopropane-1,3'-pyrrolo[2,3- <i>c</i> ]pyridin]-2'(1' <i>H</i> )-one (22) .....           | 17 |
| 1'-((1-(4-hydroxybutyl)-1 <i>H</i> -benzo[d]imidazol-2-yl)methyl)spiro[cyclopropane-1,3'-pyrrolo[2,3- <i>c</i> ]pyridin]-2'(1' <i>H</i> )-one (5).....                                     | 17 |
| 4-(4-Bromo-2-nitro-anilino)butanenitrile (26) .....                                                                                                                                        | 18 |
| 4-(4-Chloro-2-nitro-anilino)butanenitrile (27) .....                                                                                                                                       | 18 |
| 4-(4-Fluoro-2-nitro-anilino)butanenitrile (28).....                                                                                                                                        | 19 |
| 4-Bromo- <i>N</i> -(3-methylsulfonylpropyl)-2-nitroaniline (29) .....                                                                                                                      | 19 |
| 4-Bromo-2-nitro- <i>N</i> -(4,4,4-trifluorobutyl)aniline (30) .....                                                                                                                        | 19 |
| 4-Bromo- <i>N</i> -(4-(( <i>tert</i> -butyldimethylsilyl)oxy)butyl)-2-nitroaniline (31) .....                                                                                              | 20 |
| 4-(2-Amino-4-bromo-anilino)butanenitrile (32).....                                                                                                                                         | 20 |
| 4-(2-Amino-4-chloro-anilino)butanenitrile (33) .....                                                                                                                                       | 20 |
| 4-(2-Amino-4-fluoro-anilino)butanenitrile (34).....                                                                                                                                        | 21 |
| 4-bromo- <i>N</i> <sup>1</sup> -(3-methylsulfonylpropyl)benzene-1,2-diamine (35) .....                                                                                                     | 21 |
| 4-Bromo- <i>N</i> <sup>1</sup> -(4,4,4-trifluorobutyl)benzene-1,2-diamine (36).....                                                                                                        | 21 |
| 4-[5-Bromo-2-(chloromethyl)benzimidazole-1-yl]butanenitrile (38) .....                                                                                                                     | 22 |
| 4-[5-Chloro-2-(chloromethyl)benzimidazole-1-yl]butanenitrile (39) .....                                                                                                                    | 22 |
| 4-[5-Fluoro-2-(chloromethyl)benzimidazole-1-yl]butanenitrile (40) .....                                                                                                                    | 23 |
| 5-Bromo-2-(chloromethyl)-1-(3-methylsulfonylpropyl)benzimidazole (41) .....                                                                                                                | 23 |
| 5-bromo-2-(chloromethyl)-1-(4,4,4-trifluorobutyl)-1 <i>H</i> -benzo[d]imidazole (42).....                                                                                                  | 23 |
| 5-bromo-1-(4-(( <i>tert</i> -butyldimethylsilyl)oxy)butyl)-2-(chloromethyl)-1 <i>H</i> -benzo[d]imidazole (43) .....                                                                       | 24 |
| 4-[5-Bromo-2-[(2-oxo-1-tetrahydropyran-4-yl-imidazo[4,5- <i>c</i> ]pyridin-3-yl)methyl]benzimidazol-1-yl]butanenitrile (44) .....                                                          | 24 |
| 4-[5-Chloro-2-[(2-oxo-1-tetrahydropyran-4-yl-imidazo[4,5- <i>c</i> ]pyridin-3-yl)methyl]benzimidazol-1-yl]butanenitrile (45) .....                                                         | 25 |

|                                                                                                                                                                                                                       |    |
|-----------------------------------------------------------------------------------------------------------------------------------------------------------------------------------------------------------------------|----|
| 4-[5-Fluoro-2-[(2-oxo-1-tetrahydropyran-4-yl-imidazo[4,5-c]pyridin-3-yl)methyl]benzimidazol-1-yl]butanenitrile (46) .....                                                                                             | 25 |
| 4-[5-Bromo-2-[[1-(1,1-dioxothian-4-yl)-2-oxo-imidazo[4,5-c]pyridin-3-yl)methyl]benzimidazol-1-yl]butanenitrile (47) .....                                                                                             | 26 |
| 3-[[5-Bromo-1-(3-methylsulfonylpropyl)benzimidazol-2-yl)methyl]-1-tetrahydropyran-4-yl-imidazo[4,5-c]pyridin-2-one (48).....                                                                                          | 26 |
| 3-((5-bromo-1-(4,4,4-trifluorobutyl)-1 <i>H</i> -benzo[ <i>d</i> ]imidazol-2-yl)methyl)-1-(tetrahydro-2 <i>H</i> -pyran-4-yl)-1,3-dihydro-2 <i>H</i> -imidazo[4,5-c]pyridin-2-one (49) .....                          | 27 |
| 3-((5-Bromo-1-(4-(( <i>tert</i> -butyldimethylsilyl)oxy)butyl)-1 <i>H</i> -benzo[ <i>d</i> ]imidazol-2-yl)methyl)-1-(tetrahydro-2 <i>H</i> -pyran-4-yl)-1,3-dihydro-2 <i>H</i> -imidazo[4,5-c]pyridin-2-one (50)..... | 27 |
| Appendix A .....                                                                                                                                                                                                      | 28 |
| Protocols for Molecular Modeling .....                                                                                                                                                                                | 28 |
| Protein preparation.....                                                                                                                                                                                              | 28 |
| Appendix B .....                                                                                                                                                                                                      | 29 |
| Crystal Data and Experimental for Compound 1.....                                                                                                                                                                     | 29 |
| References.....                                                                                                                                                                                                       | 38 |

## ***In Vitro* Protocols for Antiviral Activity Determination**

### **Cells and viruses**

Human carcinoma (HEp-2, ATCC CCL-23) and human bronchial epithelial (BEAS-2B, ATCC CCL-9609) cells were maintained at 37°C and 5% CO<sub>2</sub> in Dulbecco's modified Eagle's medium supplemented with 7.5% fetal bovine serum.

recRSV A2-L19F<sub>D489E</sub>-fireSMASH was recovered as previously described,<sup>1</sup> and harbors a previously characterized pan-resistance mutation to RSV entry inhibitors in the F protein.<sup>2</sup> A recombinant RSV harboring a Nanoluciferase reporter, recRSV-A2-L19Fnanoluc, was constructed by exchanging the mKate reporter of previously described recRSV-A2-L19FmKate<sup>3</sup> with the Nanoluciferase ORF from pNL1.1.CMV[Nluc/CMV] (PROMEGA).

HEp-2 cells were infected at multiplicity of infection of 0.01 TCID<sub>50</sub> units/cell and incubated for 16 hours at 37°C, followed by 5 days at 32°C to generate RSV stocks. Infected cells were scrapped in DMEM and cell-associated progeny virions released through two freeze-thaw cycles. After clarification by centrifugation (4,000×g at 4°C for 20 mins), virus stocks were aliquoted and titers determined by TCID<sub>50</sub> titration on HEp-2 cells. For recRSV A2-L19F<sub>D489E</sub>-fireSMASH, stocks were subsequently purified twice through ultracentrifugation (30,000×g in a SW41 rotor (Beckman Coulter); 2 hours at 4°C) through a 20–60% single-step sucrose gradient in TNE buffer (50 mM Tris-HCl (pH 7.2), 100 mM NaCl, 10 mM EDTA). All stocks were stored at –80°C.

## Dose-response luciferase reporter assays

HEp-2 cells or BEAS-2B cells (compounds 49, 51, BMS-433771) were seeded on 96-well plates at  $1.5 \times 10^4$  cells/well 6 hours prior to the assay. 3-fold dilutions of the compounds were prepared in three replicates in 96-well plates and transferred to the cells using a Nimbus liquid handler (Hamilton Robotics). Cells were infected with recRSV-A2-L19F<sub>D489E</sub>-fireSMASH or recRSV-A2-L19F-nanoLuc at a multiplicity of infection of 0.1 TCID<sub>50</sub> units/cell. Each plate contained positive (1 mg/ml cycloheximide (Millipore Sigma), n=4) and negative (0.3% DMSO, n=4) control wells. Cell viability was assessed at 44 hours post-compound addition to uninfected cells using PrestoBlue substrate according to the manufacturer's instructions (10  $\mu$ l/well (Life Technologies)). Luminescence activity of recRSV-A2-L19F<sub>D489E</sub>-fireSMASH-infected plates were determined using ONE-Glo luciferase substrate (PROMEGA). recRSV-A2-L19F-nanoLuc-infected plates were washed twice with phosphate buffered saline and luminescence was determined using Nano-DLR substrate (PROMEGA). Fluorescence and luminescence reporter activity were recorded with an H1 synergy multimode plate reader (BioTek). Raw data were analyzed according to the formula: % effect (virus inhibition or cell viability) =  $(X_{\text{Sample}} - X_{\text{Min}})/(X_{\text{Max}} - X_{\text{Min}}) \times 100$ , with  $X_{\text{Min}}$ : mean of positive control wells and  $X_{\text{Max}}$ : mean of negative control wells. Four-parameter variable slope regression was applied to determine 50% or 90% maximal effective concentration (EC<sub>50</sub> EC<sub>90</sub>, respectively) or 50% cytotoxicity concentration (CC<sub>50</sub>), using the nonlinear regression function in the Prism 8.3 (GraphPad) software package.

**Table S1.** Antiviral Activities of Compounds Identified by Machine Learning Algorithm against Wild-type RSV and the D489E Mutant Virus.

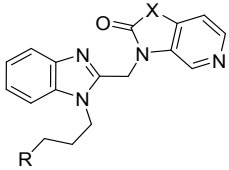

| Compd             | R                  | X                                                  | EC <sub>50</sub><br>(nM) | EC <sub>90</sub><br>(nM) | EC <sub>50</sub> D489E<br>(nM) | CC <sub>50</sub><br>(nM) |
|-------------------|--------------------|----------------------------------------------------|--------------------------|--------------------------|--------------------------------|--------------------------|
| 1                 | CN                 | NCH(CH <sub>2</sub> ) <sub>2</sub> SO <sub>2</sub> | 11                       | 1180                     | >20000                         | >300000                  |
| 2                 | CN                 | N-THP                                              | 5                        | 470                      | >20000                         | >300000                  |
| 3                 | CH <sub>2</sub> OH | NCH(CH <sub>2</sub> ) <sub>2</sub> SO <sub>2</sub> | 13                       | 1010                     | >20000                         | >300000                  |
| 4                 | CH <sub>2</sub> OH | C(CH <sub>2</sub> ) <sub>2</sub>                   | 1940                     | >2000                    | >20000                         | >300000                  |
| 5                 | CN                 | C(CH <sub>2</sub> ) <sub>2</sub>                   | 22                       | 1530                     | >20000                         | >300000                  |
| <b>BMS-433771</b> | CH <sub>2</sub> OH | N-cPr                                              | 34.5                     | >2000                    | >20000                         | >300000                  |

**Table S2.** Antiviral Activities of Compounds Featuring a Halogen on the Benzimidazole against Wild-type and the D489E Mutant Virus.

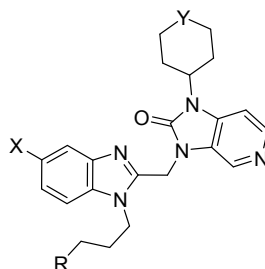

| Compd               | R                  | X  | Y               | EC <sub>50</sub><br>(nM) | EC <sub>90</sub><br>(nM) | EC <sub>50</sub> D489E<br>(nM) | CC <sub>50</sub><br>(nM) |
|---------------------|--------------------|----|-----------------|--------------------------|--------------------------|--------------------------------|--------------------------|
| 2                   | CN                 | H  | O               | 5                        | 470                      | >20000                         | >300000                  |
| 44                  | CN                 | Br | O               | 0.5                      | 2.0                      | >20000                         | >20000                   |
| 45                  | CN                 | Cl | O               | 0.7                      | 1.3                      | 4071                           | >20000                   |
| 46                  | CN                 | F  | O               | > 250                    | > 250                    | >20000                         | 15,710                   |
| 47                  | CN                 | Br | SO <sub>2</sub> | 3.1                      | 10.4                     | >20000                         | > 20000                  |
| 48                  | SO <sub>2</sub> Me | Br | O               | 8.3                      | 18.2                     | >20000                         | > 20000                  |
| 49                  | CF <sub>3</sub>    | Br | O               | 2.5                      | 15.3                     | 10526                          | >20000                   |
| 51                  | CH <sub>2</sub> OH | Br | O               | 1.3                      | 52.2                     | 19459                          | >20000                   |
| <b>BMS-433771</b>   | -                  | -  | -               | 34.5                     | >2000                    | >20000                         | >300000                  |
| <b>JNJ-53718678</b> | -                  | -  | -               | 0.9                      | 1.1                      | 6404                           | 16056                    |

### ***In Vitro* Protocols for Determination of Stability in Human Liver Microsomes**

#### **Experimental details**

Test compounds were dissolved in 100% DMSO to make 10 mM stock solutions. Verapamil (human liver microsomes, Sigma Aldrich) aided as the positive control and was dissolved in 100% DMSO to make a 10 mM stock solution. The 10 mM stock solution of test and control compounds were further diluted in potassium phosphate buffer (100 mM, pH 7.4) to 500  $\mu$ M to ensure the organic solvent content was < 0.2%.

Human liver microsomes were purchased from Xenotech at 20 mg/mL. NADPH (Sigma Aldrich) 10 mM stocks were prepared in deionized water.

The human liver microsome assay was prepared in a 1.5 mL Eppendorf tube with a final volume of 1100  $\mu$ L for duplicate runs. Each reaction contained phosphate buffer (928.4  $\mu$ L), liver microsomes (55  $\mu$ L), and test compound resulting in a final concentration of 3  $\mu$ M (6.6  $\mu$ L of 500  $\mu$ M). The reaction was initiated with 110  $\mu$ L of 10 mM NADPH. At a temperature of 37°C, aliquots (100  $\mu$ L) were removed in duplicate at 0, 5, 10, 15, 30 min time intervals and quenched in 100  $\mu$ L of cold methanol, which contains internal standard (ISTD: *d*<sub>5</sub>-7-ethoxy coumarin 4 mM). The aliquots were centrifuged at 12,000 g for 5 min and the supernatant removed and placed in an LCMS vial. Each time point was assessed on the LCMS and the area, based on the MRM transition, was integrated with respect to the ISTD. Positive controls were conducted at a final volume of 550  $\mu$ L to give each time point in a single run. Negative controls without the presence of NADPH were used for the test compound and the control at the 30 min time point to account for degradation by other means than metabolism. Controls were processed and analyzed like test compounds. Each time point was run in duplicates followed by in-between blank washes to avoid the carryover and to equilibrate the column.

### Instrumentation and method development

The analysis was performed using Agilent 1260 Infinity II HPLC, coupled with an Agilent G6460 triple quadrupole mass spectrometer (LC/MS/MS) (Agilent Technologies, USA). All the data were acquired employing Agilent 6460 Quantitative Analysis data processing software.

Separation was achieved using a Zorbax XDB C18 column (2.1 x 50 mm, 3.5  $\mu$ m) that was maintained at 40°C. for all compounds. Mobile phases consisted of water (0.1% formic acid) and ACN (0.1% formic acid) at a flow rate of 0.5 mL/min. Instrumental analysis was done using Agilent JetStream electrospray ionization in the positive mode. All compounds were analyzed using multiple reaction monitoring (MRM) with quantifying and qualifying ions for increased reliability. Deuterated ethoxy coumarin was used as an internal standard (ISTD) as well. Table 1 shows the settings for each compound.

**Table S3.** Scan parameters for the tested compounds and the associated transitions

| Compound  | Precursor Ion MS1 | Product ion MS2 | Dwell (ms) | Fragmentor voltage (V) | Collision Energy (V) | Cell Accelerator (v) | Polarity |
|-----------|-------------------|-----------------|------------|------------------------|----------------------|----------------------|----------|
| <b>1</b>  | 437.1             | 373.2           | 200        | 172                    | 25                   | 4                    | positive |
|           |                   | 198.1           |            |                        | 33                   |                      |          |
|           |                   | 145.1           |            |                        | 53                   |                      |          |
| <b>3</b>  | 442.2             | 203.1           | 200        | 162                    | 25                   | 4                    | positive |
|           |                   | 176.1           |            |                        | 41                   |                      |          |
|           |                   | 133.1           |            |                        | 41                   |                      |          |
| <b>4</b>  | 358.2             | 198.1           | 200        | 104                    | 25                   | 4                    | positive |
|           |                   | 145.1           |            |                        | 45                   |                      |          |
| <b>5</b>  | 363.2             | 291.1           | 200        | 164                    | 21                   | 4                    | positive |
|           |                   | 161.1           |            |                        | 29                   |                      |          |
|           |                   | 131.1           |            |                        | 37                   |                      |          |
| <b>45</b> | 451.2             | 232.1           | 100        | 162                    | 41                   | 4                    | positive |
|           |                   | 367.1           |            |                        | 29                   |                      |          |
| <b>46</b> | 435.2             | 351.1           | 200        | 162                    | 29                   | 4                    | positive |
|           |                   | 216.1           |            |                        | 41                   |                      |          |
| <b>47</b> | 543.1             | 276             | 100        | 200                    | 41                   | 4                    | positive |

|                                    |       |                   |     |     |                |   |          |
|------------------------------------|-------|-------------------|-----|-----|----------------|---|----------|
|                                    |       | 411               |     |     | 33             |   |          |
| <b>49</b>                          | 538.1 | 454<br>319        | 200 | 110 | 33<br>45       | 4 | positive |
| <b>51</b>                          | 500.1 | 416<br>209<br>136 | 200 | 110 | 29<br>49<br>41 | 4 | positive |
| <b>d5-7-Ethoxy coumarin (ISTD)</b> | 196.1 | 164               | 100 | 116 | 17             | 4 | positive |

## General Synthetic Procedures

Automated flash column chromatography was carried out using a Teledyne ISCO CombiFlash Companion system with silica gel-packed columns (SiliCycle Inc.) with one of or combinations of hexane, EtOAc, DCM or MeOH as the mobile phase. Analytical thin layer chromatography was performed using Merck silica gel 60 F254 coated on aluminium-supported plates. Visualization of compounds on TLC plates was accomplished UV light (254 nm) and/or using common stains such as *p*-anisaldehyde, ninhydrin (NIN) or a potassium permanganate (KMnO<sub>4</sub>) solution followed by gentle heating. NMR spectra (<sup>1</sup>H, <sup>13</sup>C and <sup>19</sup>F) were obtained using either a Varian INOVA 600 MHz spectrometer (150 MHz for <sup>13</sup>C), a Varian INOVA 500 MHz spectrometer (126 MHz for <sup>13</sup>C), a Varian INOVA 400 MHz spectrometer (101 MHz for <sup>13</sup>C), a Varian VNMR 400 MHz spectrometer (101 MHz for <sup>13</sup>C), a Bruker 600 MHz spectrometer (150 MHz for <sup>13</sup>C) or a Mercury 300 MHz spectrometer (75 MHz for <sup>13</sup>C). NMR samples were prepared in deuterated chloroform (CDCl<sub>3</sub>), deuterated methanol (CD<sub>3</sub>OD) or deuterated DMSO (DMSO-*d*<sub>6</sub>) using the residual solvent peak (CDCl<sub>3</sub>: <sup>1</sup>H = 7.26 ppm, <sup>13</sup>C = 77.16 ppm; CD<sub>3</sub>OD: <sup>1</sup>H = 3.31 ppm, <sup>13</sup>C = 49.0 ppm; DMSO-*d*<sub>6</sub>: <sup>1</sup>H = 2.50 ppm, <sup>13</sup>C = 39.5 ppm) as an internal reference. For <sup>19</sup>F NMR, the residual chloroform peak in <sup>1</sup>H NMR was used as an absolute reference unless otherwise specified. MestReNova software was used to process all NMR spectra. Chemical shifts (δ) are reported in ppm and *J* - values are given in Hz. Multiplicities are reported as a singlet (s), doublet (d), triplet (t), quartet (q), multiplet (m) or doublet of doublet (dd). All spectra were obtained at 25 °C unless otherwise reported. High resolution mass spectrometry (HRMS) was performed by the Emory University Mass Spectrometry Center, directed by Dr. Fred Strobel. Liquid chromatography-mass spectrometry (LC-MS) was performed on an Agilent 1200 HPLC equipped with a 6120 Quadrupole mass spectrometer (ESI-API) eluting with mixtures of HPLC grade MeOH and H<sub>2</sub>O or MeCN and H<sub>2</sub>O (all spiked with 0.1% formic acid) through an analytical, reverse-phase, Agilent C18 XDB eclipse column (50 mm x 4.6 mm, 3.5 μM). LC-MS samples were prepared in a solution of 75:25 MeOH/H<sub>2</sub>O (spiked with 0.1% formic acid). All reactions requiring inert conditions were carried out under a positive atmosphere of argon. All glassware was flame-dried while under vacuum or oven dried overnight before purging with argon. Standard Schlenk techniques were employed when necessary. Solvents were removed using a rotary evaporator followed by the removal of trace amounts of solvent using a high vacuum pump at ca. 0.08 mm Hg. Final compound purity was assessed using <sup>1</sup>H NMR and LC-MS. All final compounds exhibited > 95% purity.

## Synthetic Procedures and Characterization

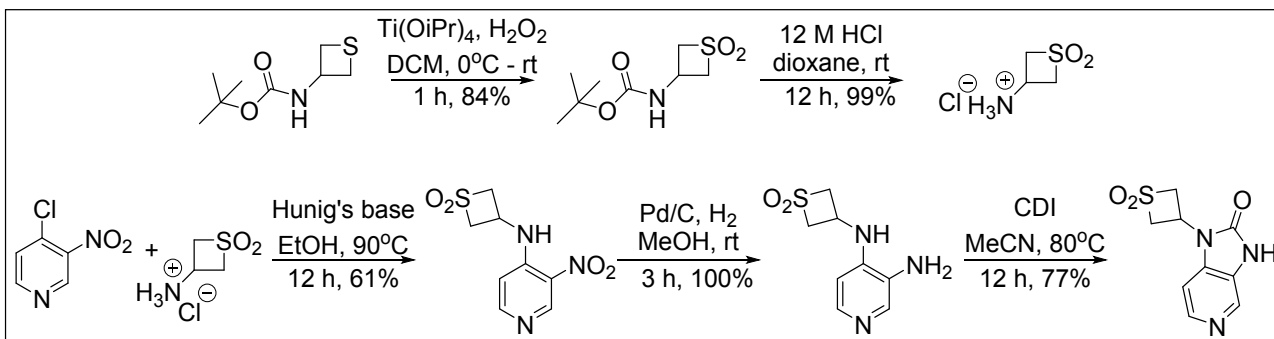

### Tert-butyl thietan-3-ylcarbamate

As in N. K. Thong *et al. Bioorg. Med. Chem. Lett.*, **2009**, *19*, 3832-5 and M. Muehle-Bach *et al.* WO 2007/080131; *tert*-butyl thietan-3-ylcarbamate (10.5 g, white solid) was synthesized from 2-aminopropane-1,3-diol in three steps and 48 % overall yield.  $^1\text{H NMR}$  (400 MHz,  $\text{CDCl}_3$ )  $\delta$  5.08 (s, 1H), 5.01 – 4.90 (m, 1H), 3.31 (d,  $J = 8.5$  Hz, 4H), 1.42 (s, 9H).  $^{13}\text{C NMR}$  (100 MHz,  $\text{CDCl}_3$ )  $\delta$  153.9, 79.9, 48.5, 36.4, 28.3.

### Tert-butyl (1,1-dioxidothietan-3-yl)carbamate

As in J. A. Burkhard *et al. Org. Lett.*, **2010**, *12*, 1944-1947; a 1 L RB flask equipped with a magnetic stir bar and rubber septum was charged with *tert*-butyl thietan-3-ylcarbamate (10.4 g, 54.7 mmol, 1 equiv.) and DCM (456 mL). Then  $\text{Ti}(\text{OiPr})_4$  (16.0 mL, 54.7 mmol, 1 equiv) was added dropwise, followed by  $\text{H}_2\text{O}_2$  (22.4 mL, 219 mmol, 4 equiv.) at  $0^\circ\text{C}$ . After stirring at  $0^\circ\text{C}$  for 15 min, the reaction was allowed to warm to rt and the stirring was continued for 1 h. The reaction mixture was quenched by addition of water and the product was extracted with DCM (3x) and dried over  $\text{Na}_2\text{SO}_4$ . The organics were concentrated and the crude product was purified on silica gel column (40 g) using 0 to 20% EtOAc as eluent affording *tert*-butyl (1,1-dioxidothietan-3-yl)carbamate (10.2 g, 84%) as a white solid.  $^1\text{H NMR}$  (400 MHz,  $\text{CDCl}_3$ )  $\delta$  5.19 (s, 1H), 4.53 – 4.43 (m, 3H), 4.02 – 3.92 (m, 2H), 1.45 (s, 9H). LC-MS (ESI-API, 254 nm) 95 % MeOH in  $\text{H}_2\text{O}$  (0.1%  $\text{HCO}_2\text{H}$ ), 3 min, 1.00 ml/min, C18 (Agilent Zorbax XDB-18, 50 mm x 4.6 mm, 3.5  $\mu\text{m}$ ),  $m/z = 244.0$  (M + Na),  $t = 0.546$  min (MS signal).

### 3-Aminothietane 1,1-dioxide hydrochloride

A 500 ml RB flask equipped with a stirrer bar was charged with *tert*-butyl (1,1-dioxidothietan-3-yl)carbamate (8.00 g, 36.2 mmol, 1 equiv.), 12 M HCl (12.1 mL, 145 mmol, 4 equiv.) and dioxane (181 mL). After stirring at rt for 12 h, the suspension was concentrated affording 3-aminothietane 1,1-dioxide hydrochloride (5.63 g, 99%) as a white solid.  $^1\text{H NMR}$  (400 MHz,  $\text{DMSO}-d_6$ )  $\delta$  8.85 (s, 3H), 4.56 – 4.48 (m, 2H), 4.44 – 4.36 (m, 2H), 4.09 (tt,  $J = 9.0, 6.3$  Hz, 1H). LC-MS (ESI-API, 254 nm) 75-95 % MeOH in  $\text{H}_2\text{O}$  (0.1%  $\text{HCO}_2\text{H}$ ), 3 min, 1.00 ml/min, C18 (Agilent Zorbax XDB-18, 50 mm x 4.6 mm, 3.5  $\mu\text{m}$ ),  $m/z = 122.0$  (M + H),  $t = 0.499$  min (MS signal).



### 3-((3-Nitropyridin-4-yl)amino)thietane 1,1-dioxide (7)

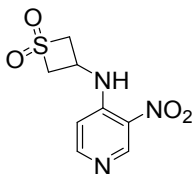

A 100 ml Schlenk tube equipped with a magnetic stirrer bar and cold finger condenser was charged with 3-aminothietane 1,1-dioxide hydrochloride (2.67 g, 16.9 mmol, 1.1 equiv.), DIPEA (5.7 mL, 32.3 mmol, 2.1 equiv.) and abs. EtOH (20 mL). The suspension was stirred at rt until the amine was dissolved. Then 4-chloro-3-nitropyridine (2.44 g, 15.4 mmol, 1 equiv.) was added and EtOH (5.0 mL) was used to wash in 4-chloro-3-nitropyridine. After heating at refluxing temperature for 5 h, NaOH (1.75 g, 32.3 mmol, 2.1 equiv.) dissolved in MeOH (5 mL) was added, stirred for 12 h and the product was filtered and washed with water. The product was dispensed in water and filtered again affording 3-((3-nitropyridin-4-yl)amino)thietane 1,1-dioxide (2.29 g, 61%) as a bright yellow solid. **<sup>1</sup>H NMR (400 MHz, DMSO-*d*<sub>6</sub>)** δ 9.07 (s, 1H), 8.45 (d, *J* = 5.9 Hz, 1H), 8.37 (d, *J* = 6.1 Hz, 1H), 7.00 (d, *J* = 6.1 Hz, 1H), 4.74 – 4.67 (m, 2H), 4.65 – 4.56 (m, 1H), 4.55 – 4.49 (m, 2H). **LC-MS (ESI-API, 254 nm)** 75-95 % MeOH in H<sub>2</sub>O (0.1% HCO<sub>2</sub>H), 3 min, 1.00 ml/min, C18 (Agilent Zorbax XDB-18, 50 mm x 4.6 mm, 3.5 μm), *m/z* = 244.0 (M + H), 266.0 (M + Na), *t* = 0.557 min.

### 3-((3-Aminopyridin-4-yl)amino)thietane 1,1-dioxide (10)

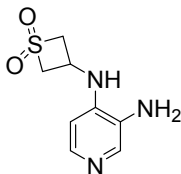

A 500 ml Parr shaker bomb was charged with 3-((3-nitropyridin-4-yl)amino)thietane 1,1-dioxide (2.24 g, 9.21 mmol, 1 equiv.), 10 w% palladium on carbon (98.0 mg, 0.0920 mmol, 0.01 equiv.) and MeOH (23 mL) and the bottle was installed on the Parr shaker. After shaking at rt and 40 psi H<sub>2</sub> pressure for 3 h, white precipitate was formed. More MeOH was added to dissolve the product and the suspension was filtered through a celite plug. The plug was slowly washed with MeOH, water and ether. The organics were concentrated and the product was dissolved in dioxane and toluene. After concentration of the organics, the product was dried under high vacuum for 12 h affording 3-((3-aminopyridin-4-yl)amino)thietane 1,1-dioxide (1.97 g, 100%) as a beige solid. **<sup>1</sup>H NMR (400 MHz, DMSO-*d*<sub>6</sub>)** δ 7.71 (s, 1H), 7.62 (d, *J* = 5.2 Hz, 1H), 6.29 (d, *J* = 5.3 Hz, 1H), 5.99 (d, *J* = 5.5 Hz, 1H), 4.74 – 4.66 (m, 4H), 4.24 (td, *J* = 8.4, 4.3 Hz, 1H), 4.11 – 4.04 (m, 2H). **LC-MS (ESI-API, 254 nm)** 75-95 % MeOH in H<sub>2</sub>O (0.1% HCO<sub>2</sub>H), 3 min, 1.00 ml/min, C18 (Agilent Zorbax XDB-18, 50 mm x 4.6 mm, 3.5 μm), *m/z* = 214.0 (M + H), *t* = 0.490 min.

### 1-(1,1-Dioxidothietan-3-yl)-1,3-dihydro-2*H*-imidazo[4,5-*c*]pyridin-2-one (13)

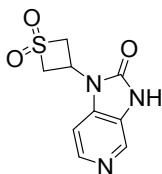

A 100 ml Schlenk tube equipped with a magnetic stirrer bar and cold finger condenser was charged with 3-((3-aminopyridin-4-yl)amino)thietane 1,1-dioxide (400 mg, 1.88 mmol, 1 equiv.) and acetonitrile (18.8 mL) and heated to 80°C to dissolve the starting material. The heating was removed and CDI (608 mg, 3.75 mmol, 2 equiv.) dissolved in acetonitrile (18.8 mL) was added. After heating at 80°C for 12 h, the organics were concentrated, filtered and washed with DCM affording 1-(1,1-dioxidothietan-3-yl)-1,3-dihydro-2*H*-imidazo[4,5-*c*]pyridin-2-one (345 mg, 77%) as a brownish orange solid. **<sup>1</sup>H NMR (400 MHz, DMSO-*d*<sub>6</sub>)** δ 11.41 (s, 1H), 8.24 (d, *J* = 5.0 Hz, 1H), 8.23 (s, 1H), 7.43 (d, *J* = 5.4 Hz, 1H), 5.35 (tt, *J* = 9.8, 7.4 Hz, 1H), 5.02 – 4.94 (m, 2H), 4.67 – 4.58 (m, 2H). **<sup>13</sup>C NMR (151 MHz, DMSO-*d*<sub>6</sub>)** δ 153.2, 142.2, 135.2, 129.8, 125.8, 104.2, 68.2, 32.9. **LC-MS (ESI-API, 254 nm)** 75-95 % MeOH in H<sub>2</sub>O (0.1% HCO<sub>2</sub>H), 3 min, 1.00 ml/min, C18 (Agilent Zorbax XDB-18, 50 mm x 4.6 mm, 3.5 μm), *m/z* = 240.0 (M + H), 262.0 (M + Na), *t* = 0.495 min. **HRMS (ESI+)** *m/z*: [M + H]<sup>+</sup> Calcd for C<sub>9</sub>H<sub>10</sub>N<sub>3</sub>O<sub>3</sub>S 240.0437; Found 240.0432, error -2.1 ppm. **Mp** = >250°C.

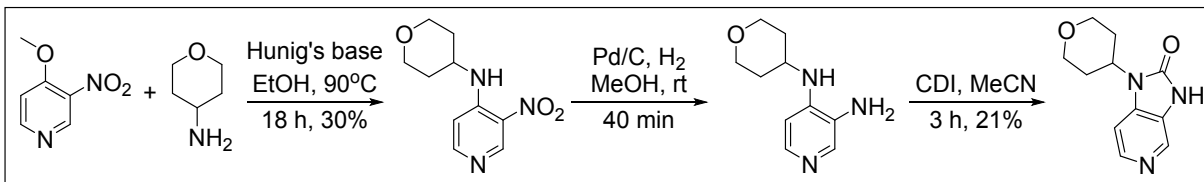

### 3-Nitro-*N*-(tetrahydropyran-4-yl)pyridin-4-amine (8)

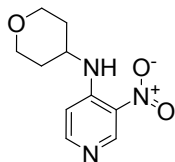

To a 75 ml sealed flask with teflon screw cap was added 4-methoxy-3-nitropyridine (6.86 g, 44.5 mmol), tetrahydro-2H-pyran-4-amine (3.1 ml, 30 mmol), absolute EtOH (49 ml) and Hunig's Base (7.8 ml, 45 mmol) then the vessel was tightly sealed and heated in a 90 °C oil bath for 18 h. The reaction was cooled to 0 °C and the yellow precipitate was collected and washed with hexanes. The solid was dried in vacuo to yield the product (2.0 g, 9.0 mmol, 30% yield) as a yellow solid.  $^1\text{H NMR}$  (600 MHz,  $\text{DMSO-}d_6$ )  $\delta$  9.03 (s, 1H), 8.27 (dd,  $J = 6.2, 0.8$  Hz, 1H), 8.02 (d,  $J = 7.9$  Hz, 1H), 7.15 (d,  $J = 6.3$  Hz, 1H), 3.96 – 3.90 (m, 1H), 3.87 (ddd,  $J = 12.1, 4.2, 2.7$  Hz, 2H), 3.47 (td,  $J = 11.6, 2.2$  Hz, 2H), 1.89 (ddd,  $J = 12.6, 4.5, 2.2$  Hz, 2H), 1.71 – 1.59 (m, 2H).  $^{13}\text{C NMR}$  (126 MHz,  $\text{DMSO-}d_6$ )  $\delta$  152.8, 148.3, 147.0, 109.5, 108.8, 65.6, 48.1, 31.8. HRMS (APCI)  $m/z$  calc. for  $\text{C}_{10}\text{H}_{14}\text{O}_3\text{N}_3$   $[\text{M}+\text{H}]^+$ , 224.10297 found, 224.10274.

### *N*<sup>4</sup>-(Tetrahydropyran-4-yl)pyridine-3,4-diamine (11)

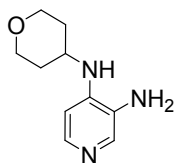

3-Nitro-*N*-(tetrahydro-2H-pyran-4-yl)pyridin-4-amine (1.14 g, 5.11 mmol) was hydrogenated in anhydrous MeOH (100 ml) in the presence of 10% palladium on carbon (0.8 g, 7.52 mmol) at 40 psi for 40 minutes. The mixture was filtered through celite and washed with MeOH then concentrated to afford *N*<sup>4</sup>-(tetrahydro-2H-pyran-4-yl)pyridine-3,4-diamine as a light orange solid. The light orange solid was used in the next step without purification.  $^1\text{H NMR}$  (400 MHz,  $\text{CD}_3\text{OD}$ )  $\delta$  7.68 (s, 1H), 7.65 (d,  $J = 5.6$  Hz, 1H), 6.55 (d,  $J = 5.7$  Hz, 1H), 4.01 – 3.92 (m, 2H), 3.63 (tt,  $J = 10.6, 4.1$  Hz, 1H), 3.55 (td,  $J = 11.7, 2.1$  Hz, 2H), 2.00 (ddd,  $J = 12.8, 4.4, 2.2$  Hz, 2H), 1.63 – 1.48 (m, 2H).  $^{13}\text{C NMR}$  (101 MHz,  $\text{DMSO-}d_6$ )  $\delta$  139.8, 134.8, 130.9, 104.4, 88.2, 66.0, 47.6, 32.7. HRMS (APCI)  $m/z$  calc. for  $\text{C}_{10}\text{H}_{16}\text{ON}_3$   $[\text{M}+\text{H}]^+$ , 194.12879 found, 194.12861.

### 3-Tetrahydropyran-4-yl-1*H*-benzimidazol-2-one (14)

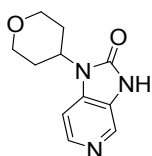

To a 50 ml RB flask was added *N*<sup>4</sup>-(tetrahydro-2H-pyran-4-yl)pyridine-3,4-diamine (595 mg, 3.08 mmol), MeCN (20 ml) and CDI (549 mg, 3.39 mmol) at rt. The reaction was heated to reflux for 3 h, cooled to rt and concentrated in vacuo. The residue was dissolved in DCM, washed with water, dried with  $\text{Na}_2\text{SO}_4$ , filtered and concentrated. The residue was purified via combiflash (5:95 to 30:70 MeOH:EtOAc) to afford 1-(tetrahydro-2H-pyran-4-yl)-1H-imidazo[4,5-*c*]pyridin-2(3*H*)-one (140 mg, 0.639 mmol, 21% yield).  $^1\text{H NMR}$  (400 MHz,  $\text{DMSO-}d_6$ )  $\delta$  8.19 (s, 1H), 8.14 (d,  $J = 5.3$  Hz, 1H), 7.32 (d,  $J = 5.3$  Hz, 1H), 4.41 (tt,  $J = 12.3, 4.2$  Hz, 1H), 3.98 (dd,  $J = 11.5, 4.5$  Hz, 2H), 3.46 (td,  $J = 12.0, 1.9$  Hz, 2H), 2.32 (qd,  $J = 12.4, 4.6$  Hz, 2H), 1.70 – 1.60 (m, 2H).  $^{13}\text{C NMR}$  (126 MHz,  $\text{DMSO-}d_6$ )  $\delta$  153.3, 141.9, 135.2, 129.5, 125.9, 104.2, 66.5, 49.3, 29.5. HRMS (APCI)  $m/z$  calc. for  $\text{C}_{11}\text{H}_{14}\text{O}_2\text{N}_3$   $[\text{M}+\text{H}]^+$ , 220.10805 found, 220.1077. LC/MS 10-95% MeOH in  $\text{H}_2\text{O}$  over 6 minutes,  $r_t = 0.757$  at 254 nM, MS (+) 220.2.

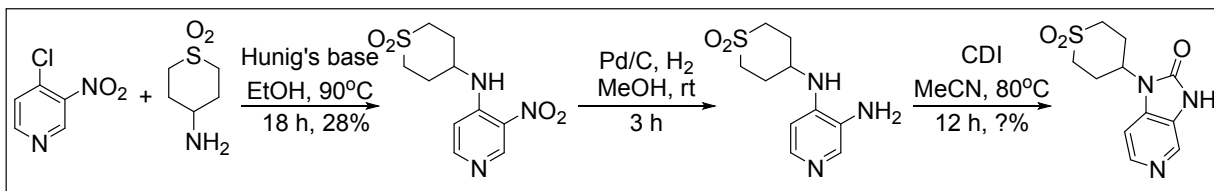

### ***N*-(1,1-Dioxothian-4-yl)-3-nitro-pyridin-4-amine (9)**

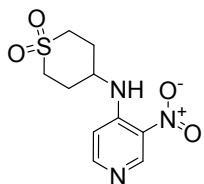

4-Chloro-3-nitro-pyridine (5.20 g, 32.8 mmol), tetrahydropyran-4-amine (5.1 mL, 49 mmol) and *N,N*-diisopropylethylamine (8.6 mL, 49 mmol) in ethanol (20 mL) was heated under reflux for 1.5 hours. Once TLC confirmed full consumption of the 4-chloro-3-nitropyridine, the reaction was cooled to room temperature and concentrated in vacuo. The crude yellow solid was subsequently recrystallized from hot methanol to yield the product 3-nitro-*N*-tetrahydropyran-4-yl-pyridin-4-amine (4.16 g, 18.6 mmol, 57% yield) as a bright yellow solid. <sup>1</sup>H NMR (500 MHz, DMSO-*d*<sub>6</sub>) δ 9.03 (s, 1H), 8.32 (dd, *J* = 6.2, 0.8 Hz, 1H), 8.08 (d, *J* = 8.3 Hz, 1H), 7.12 (d, *J* = 6.3 Hz, 1H), 4.15 – 4.04 (m, 1H), 3.39 – 3.30 (m, 2H), 3.19 – 3.11 (m, 2H), 2.26 – 2.14 (m, 4H). <sup>13</sup>C NMR (126 MHz, DMSO-*d*<sub>6</sub>) δ 153.0, 148.3, 147.0, 129.7, 108.6, 49.1, 47.7, 28.8. HRMS (APCI) *m/z* calc. for C<sub>10</sub>H<sub>14</sub>O<sub>4</sub>N<sub>3</sub><sup>32</sup>S [M+H]<sup>+</sup>, 272.06995 found, 272.06959.

### ***N*<sup>4</sup>-(1,1-Dioxothian-4-yl)pyridine-3,4-diamine (12)**

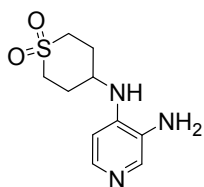

*N*-(1,1-Dioxothian-4-yl)-3-nitro-pyridin-4-amine (250 mg, 0.921 mmol, 1 eq) was hydrogenated in EtOH (10 ml) in the presence of 10% palladium on carbon (10 mg, 0.0092 mmol, 0.01 eq) under an atmosphere of hydrogen (balloon). The mixture was filtered through celite and washed with EtOH and then concentrated to afford the product (213 mg, 0.883 mmol) as an off-white solid. The product was used in the next step without purification. <sup>1</sup>H NMR (500 MHz, DMSO-*d*<sub>6</sub>) δ 7.66 (s, 1H), 7.59 (d, *J* = 5.3 Hz, 1H), 6.43 (d, *J* = 5.5 Hz, 1H), 5.30 (d, *J* = 7.9 Hz, 1H), 4.69 (s, 2H), 3.80 – 3.70 (m, 1H), 3.32 – 3.22 (m, 2H), 3.19 – 3.11 (m, 2H), 2.24 – 2.14 (m, 2H), 2.01 – 1.90 (m, 2H). <sup>13</sup>C NMR (126 MHz, DMSO-*d*<sub>6</sub>) δ 139.7, 139.5, 134.9, 131.2, 104.5, 48.8, 46.4, 29.1. HRMS (APCI) *m/z* calc. for C<sub>10</sub>H<sub>16</sub>O<sub>2</sub>N<sub>3</sub><sup>32</sup>S [M+H]<sup>+</sup>, 242.09577 found, 242.09553.

### **1-(1,1-Dioxothian-4-yl)-3*H*-imidazo[4,5-*c*]pyridin-2-one (15)**

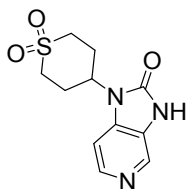

To a 25 mL flask was added *N*<sup>4</sup>-(1,1-dioxothian-4-yl)pyridine-3,4-diamine (381 mg, 1.58 mmol, 1 eq), MeCN (10 ml) and CDI (307 g, 1.90 mmol, 1.2 eq) at rt. The reaction was allowed to stir vigorously at room temperature for 18 hours after which the resulting white precipitate was collected by filtration and dried under vacuum to give the desired product (146 mg, 0.515 mmol, 33%) as white solid. <sup>1</sup>H NMR (500 MHz, DMSO-*d*<sub>6</sub>) δ 11.27 (s, 1H), 8.22 – 8.18 (m, 2H), 7.19 (d, *J* = 5.4 Hz, 1H), 4.69 – 4.58 (m, 1H), 3.51 – 3.42 (m, 2H), 3.20 – 3.12 (m, 2H), 2.83 – 2.71 (m, 2H), 2.10 – 2.03 (m, 2H). <sup>13</sup>C NMR (126 MHz, DMSO-*d*<sub>6</sub>) δ 153.1, 142.0, 135.2, 129.6, 126.0, 103.7, 49.4, 48.4, 26.9. HRMS (APCI) *m/z* calc. for C<sub>11</sub>H<sub>14</sub>O<sub>3</sub>N<sub>3</sub><sup>32</sup>S [M+H]<sup>+</sup>, 268.07504 found, 268.07478.

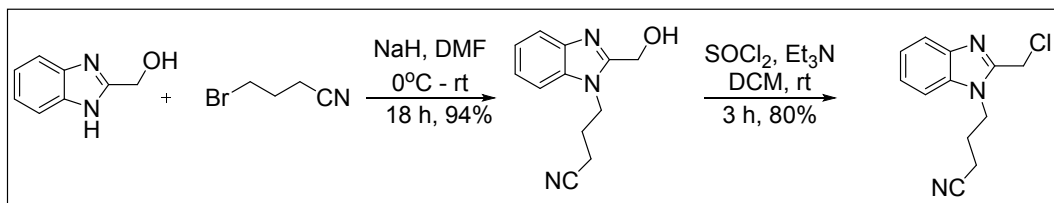

#### 4-(2-(Hydroxymethyl)-1H-benzo[d]imidazol-1-yl)butanenitrile (18)

Into a 100 mL three neck RB flask containing Ar(g) was placed DMF (40 mL), followed by (1H-benzo[d]imidazol-2-yl)methanol (2.20 g, 14.9 mmol), thus forming a pale orange solution. This was cooled to 0 °C and 60% sodium hydride (0.772 g, 19.3 mmol) was added in one portion. After stirring for 10 min under Ar(g) at 0 °C, 4-bromobutanenitrile (2.64 g, 17.8 mmol) was added in one portion. The reaction was allowed to warm to rt and left to proceed for 18 h. The reaction mixture was diluted with DCM and then poured onto a brine solution. The organic layer was separated and the aqueous phase was extracted three times with DCM. The combined organic fractions were dried over anhydrous sodium sulfate and then concentrated in vacuo. Purification by column chromatography (100% DCM to 3% MeOH/DCM) afforded the desired product as a viscous oil which solidified to a white solid over a period of hours (2.99 g, 13.9 mmol, 94%). **<sup>1</sup>H NMR (600 MHz, CDCl<sub>3</sub>)** δ 7.68 – 7.63 (m, 1H), 7.37 – 7.35 (m, 1H), 7.31 – 7.24 (m, 2H), 6.50 (s, 1H), 4.87 (s, 2H), 4.40 (t, *J* = 7.0 Hz, 2H), 2.41 – 2.38 (m, 2H), 2.30 – 2.24 (m, 2H). **<sup>13</sup>C NMR (151 MHz, CDCl<sub>3</sub>)** δ 153.6, 141.4, 134.8, 123.5, 122.8, 119.5, 118.7, 109.5, 56.6, 42.3, 25.7, 14.8. **HRMS** calc. for C<sub>12</sub>H<sub>14</sub>N<sub>3</sub>O [M+H]<sup>+</sup>, 216.11314 found, 216.11285.

#### 4-(2-(Chloromethyl)-1H-benzo[d]imidazol-1-yl)butanenitrile (20)

Into a three neck RB flask containing Ar(g) was placed DCM (10 mL), followed by 4-(2-(hydroxymethyl)-1H-benzo[d]imidazol-1-yl)butanenitrile (500 mg, 2.32 mmol), thus forming a clear solution. This was cooled to 0 °C using an ice bath and then SOCl<sub>2</sub> (359 mg, 3.02 mmol) was added in one portion against a flow of Ar(g), followed by triethylamine. The ice bath was removed after 5 min and the reaction was left to proceed at rt for 3 h. The reaction mixture was then concentrated in vacuo to afford a white solid. This was then taken up into DCM and washed with a saturated NaHCO<sub>3</sub> solution. After separation, the aqueous phase was extracted three times with DCM. The combined organic fractions were concentrated in vacuo. Purification by column chromatography (3% MeOH/DCM) afforded a clear viscous oil, which solidified to a white solid under vacuum for several hours (436 mg, 1.87 mmol, 80%). **<sup>1</sup>H NMR (400 MHz, CDCl<sub>3</sub>)** δ 7.83 – 7.72 (m, 1H), 7.46 – 7.25 (m, 3H), 4.86 (s, 2H), 4.43 – 4.35 (m, 2H), 2.47 – 2.43 (m, 2H), 2.34 – 2.25 (m, 2H). **<sup>13</sup>C NMR (101 MHz, CDCl<sub>3</sub>)** δ 148.6, 142.2, 135.0, 124.1, 123.0, 120.6, 118.3, 109.5, 42.5, 36.7, 25.3, 14.8. **HRMS** calc. for C<sub>12</sub>H<sub>13</sub>ClN<sub>3</sub> [M+H]<sup>+</sup>, 234.07925, found 234.07906.

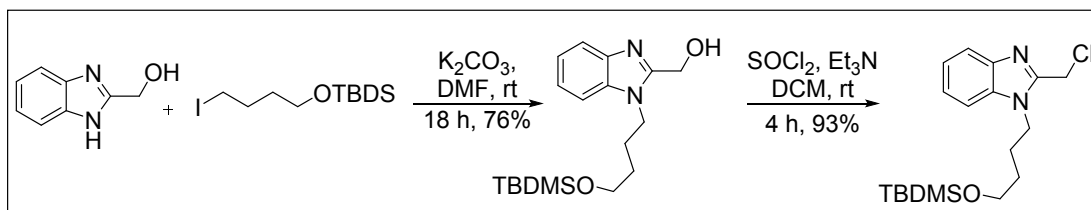

### (1-(4-((*tert*-Butyldimethylsilyl)oxy)butyl)-1*H*-benzo[d]imidazol-2-yl)methanol (19)

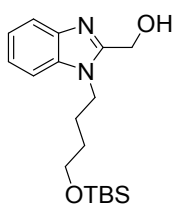

An oven-dried 100 mL three neck RB flask was charged with Ar(g), (1*H*-benzo[d]imidazol-2-yl)methanol (300 mg, 2.03 mmol), and anhydrous DMF (10 mL) to give a pale orange solution. To this was added potassium carbonate (420 mg, 3.04 mmol) in one portion, followed by *tert*-butyl(4-iodobutoxy)dimethylsilane (0.63 mL, 2.43 mmol). The reaction was left to stir under Ar(g) at rt for 18 h. The reaction was diluted with DCM and washed with brine solution before being extracted with DCM (2x50 mL). The organic extract was dried over sodium sulfate, filtered and concentrated to 0.865 g of lightly yellow oil, which was purified via silica gel flash column chromatography (0-10% MeOH in DCM). The fractions of interest were pooled, and the desired product was isolated as well as unreacted starting material (0.515 g, 76% yield). **<sup>1</sup>H NMR (500 MHz, CDCl<sub>3</sub>)** δ 7.65 (d, *J* = 8.0 Hz, 1H), 7.30 (d, *J* = 7.0 Hz, 1H), 7.24-7.19 (m, 2H), 4.86 (s, 2H), 4.25 (t, *J* = 7.5 Hz, 2H), 3.62 (t, *J* = 6.0 Hz, 2H), 1.92 (p, *J* = 7.5 Hz, 2H), 1.57 (p, *J* = 6.0 Hz, 2H), 0.88 (s, 9H), 0.03 (s, 6H) ppm. **<sup>13</sup>C NMR (125 MHz, CDCl<sub>3</sub>)** δ 154.0, 141.6, 135.1, 122.9, 122.2, 119.3, 110.0, 62.5, 56.6, 43.9, 30.0, 26.7, 26.0, 18.4, -5.22, -5.25, ppm. **HRMS (ESI+)** *m/z*: [M + H]<sup>+</sup> Calcd for C<sub>18</sub>H<sub>31</sub>N<sub>2</sub>O<sub>2</sub>Si 335.2149; Found 335.2144.

### 1-(4-((*tert*-butyldimethylsilyl)oxy)butyl)-2-(chloromethyl)-1*H*-benzo[d]imidazole (21)

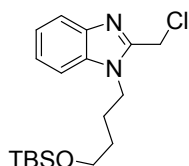

An oven-dried three neck 100 mL RB flask was charged with Ar(g), (1-(4-((*tert*-butyldimethylsilyl)oxy)butyl)-1*H*-benzo[d]imidazol-2-yl)methanol (0.718 g, 2.146 mmol), and benzene (10.7 mL) to give a light green solution. Triethylamine (0.45 mL, 3.22 mmol) was then added, which turned the solution completely colorless, and the solution was stirred briefly before thionyl chloride (0.28 mL, 3.86 mmol) was added dropwise under Ar(g), immediately releasing a gas and turning the solution light red. The reaction was allowed to stir at ambient temperature for 3.5 hours when monitoring by TLC (5% methanol in DCM) showed complete conversion of starting material to the desired less polar spot. The reaction was diluted with DCM before being quenched with saturated sodium bicarbonate solution, and the product was extracted with DCM (2x50 mL). The organic extract was dried over sodium sulfate, filtered and concentrated to give the desired product as a red oil (0.702 g, 93% yield). **<sup>1</sup>H NMR (600 MHz, CDCl<sub>3</sub>)** δ 7.78-7.75 (m, 1H), 7.39 (dd, *J* = 6.6, 0.6 Hz, 1H), 7.33-7.27 (m, 2H), 4.86 (s, 2H), 4.30 (t, *J* = 7.8 Hz, 2H), 3.68 (t, *J* = 6.0 Hz, 2H), 2.02-1.97 (m, 2H), 1.65-1.60 (m, 2H), 0.89 (s, 9H), 0.05 (s, 6H) ppm. **<sup>13</sup>C NMR (150 MHz, CDCl<sub>3</sub>)** δ 148.8, 135.5, 128.5, 123.7, 122.8, 120.5, 110.2, 62.5, 44.5, 36.9, 30.1, 26.8, 26.1, 18.4, -5.2 ppm. **HRMS (ESI+)** *m/z*: [M + H]<sup>+</sup> Calcd for C<sub>18</sub>H<sub>30</sub>ClN<sub>2</sub>O<sub>2</sub>Si 353.1810; Found 353.1811.

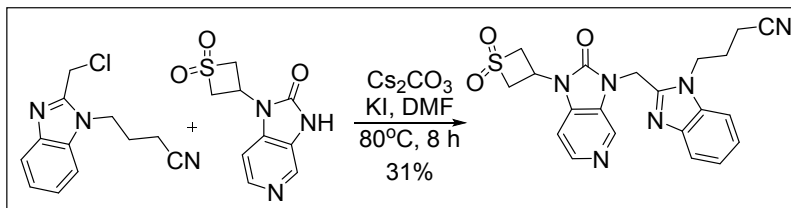

### 4-(2-((1-(1,1-dioxidothietan-3-yl)-2-oxo-1,2-dihydro-3*H*-imidazo[4,5-*c*]pyridin-3-yl)methyl)-1*H*-benzo[d]imidazol-1-yl)butanenitrile (1)

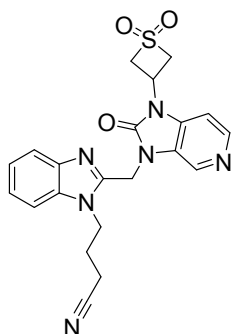

A 50 mL Schlenk tube equipped with a magnetic stirrer bar and cold finger condenser was charged with 1-(1,1-dioxidothietan-3-yl)-1,3-dihydro-2*H*-imidazo[4,5-*c*]pyridin-2-one (160 mg, 0.669 mmol, 1 equiv.), Cs<sub>2</sub>CO<sub>3</sub> (327 mg, 1.00 mmol, 1.5 equiv.), KI (11.0 mg, 0.0670 mmol, 0.1 equiv.), 4-(2-(chloromethyl)-1*H*-benzo[d]imidazol-1-yl)butanenitrile (188 mg, 0.803 mmol, 1.2 equiv.) and DMF (6.7 mL). After heating at

80°C for 8 h, the reaction mixture was quenched by addition of water, extracted with DCM (3x) and dried over Na<sub>2</sub>SO<sub>4</sub>. The crude product was purified on silica gel column (120 g) using 0 to 10% MeOH in DCM as eluent affording 4-(2-((1-(1,1-dioxidothietan-3-yl)-2-oxo-1,2-dihydro-3H-imidazo[4,5-c]pyridin-3-yl)methyl)-1H-benzo[d]imidazol-1-yl)butanenitrile (89.0 mg, 31%). The product was recrystallized from EtOAc and MeOH affording slightly brown crystals which were submitted for X-ray crystal structure determination. **<sup>1</sup>H NMR (400 MHz, CDCl<sub>3</sub>)** δ 8.87 (d, *J* = 0.8 Hz, 1H), 8.45 (d, *J* = 5.4 Hz, 1H), 7.80 – 7.75 (m, 1H), 7.41 (dd, *J* = 5.4, 0.8 Hz, 1H), 7.39 – 7.28 (m, 3H), 5.50 – 5.37 (m, 1H), 5.40 (s, 2H), 4.93 – 4.83 (m, 2H), 4.69 – 4.58 (m, 2H), 4.49 (dd, *J* = 8.1, 6.9 Hz, 1H), 3.49 (d, *J* = 5.4 Hz, 1.3H, MeOH), 2.45 (t, *J* = 7.0 Hz, 2H), 2.15 (p, *J* = 7.1 Hz, 2H), 0.97 (q, *J* = 5.5 Hz, 0.43H, MeOH). **<sup>13</sup>C NMR (100 MHz, CDCl<sub>3</sub>)** δ 152.4, 146.9, 144.5, 142.4, 134.9, 132.9, 131.8, 126.3, 124.0, 123.1, 120.6, 118.4, 109.5, 103.7, 68.7, 42.4, 38.7, 33.5, 25.9, 14.7. **HRMS (ESI+)** calcd for C<sub>21</sub>H<sub>21</sub>N<sub>6</sub>O<sub>3</sub>S ([M+H]<sup>+</sup>): 437.1390. Found: 437.1386, error 0.5 ppm; calcd for C<sub>21</sub>H<sub>20</sub>N<sub>6</sub>O<sub>3</sub>SNa ([M+Na]<sup>+</sup>): 459.1210. Found: 459.1216, error 0.6 pp; **LC-MS (ESI-API, 254 nm)** 50-95 % MeOH in H<sub>2</sub>O (0.1% HCO<sub>2</sub>H), 6 min, 1.00 mL/min, C18 (Agilent Zorbax XDB-18, 50 mm x 4.6 mm, 3.5 μm), *m/z* = 437.0 (M + H), 459.0 (M + Na), *t* = 0.569 min. **Mp** = 132.5-133.5°C.

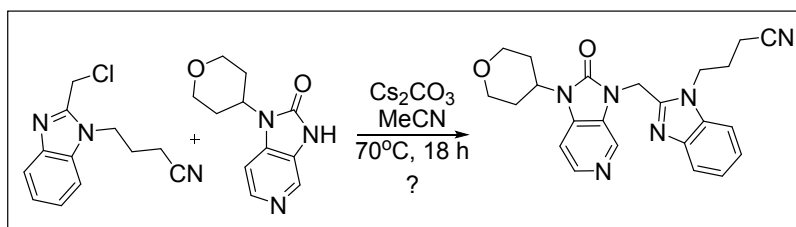

#### 4-(2-((2-oxo-1-(tetrahydro-2H-pyran-4-yl)-1,2-dihydro-3H-imidazo[4,5-c]pyridin-3-yl)methyl)-1H-benzo[d]imidazol-1-yl)butanenitrile (2)

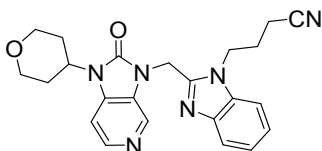

To a 15 mL tube was added cesium carbonate (0.250 g, 0.766 mmol), 1-(2-oxo-1-(tetrahydro-2H-pyran-4-yl)-1,2-dihydro-3H-imidazo[4,5-c]pyridin-2(3H)-one (0.140 g, 0.639 mmol) and 4-(2-(chloromethyl)-1H-benzo[d]imidazol-1-yl)butanenitrile (0.157 g, 0.670 mmol) dissolved in MeCN (8 mL) then the vessel was sealed with a teflon screw cap and heated in a 70 °C oil bath overnight. The reaction was cooled to rt, filtered over celite with MeOH and concentrated in vacuo. The residue was purified by column (0-10% MeOH in DCM). The fractions were concentrated in vacuo, triturated with CHCl<sub>3</sub> then PhMe and dried in vacuo overnight. The solid (168 mg) was recrystallized using MeOH (7 mL) to obtain white needles (88 mg, 0.21 mmol, 33%) co-crystallized with MeOH (X-Ray). **<sup>1</sup>H NMR (600 MHz, CDCl<sub>3</sub>)** δ 8.83 (s, 1H), 8.31 (d, *J* = 5.4 Hz, 1H), 7.79 (dd, *J* = 7.0, 1.6 Hz, 1H), 7.36 (dd, *J* = 6.8, 1.4 Hz, 1H), 7.31 (m, 2H), 7.13 (dd, *J* = 5.4, 0.6 Hz, 1H), 5.39 (s, 2H), 4.59 (m, 1H), 4.48 (dd, *J* = 7.5, 7.6 Hz, 2H), 4.15 (dd, *J* = 11.5, 4.5 Hz, 2H), 3.56 (dt, *J* = 12.2, 1.7 Hz, 2H), 3.48 (d, *J* = 5.2, 2H, MeOH), 2.47 – 2.40 (m, 4H), 2.06 (p, *J* = 6.9 Hz, 2H), 1.78 (dd, *J* = 12.4, 2.6 Hz, 2H), 1.08 (q, *J* = 5.5 Hz, 0.66H, MeOH); **<sup>13</sup>C NMR (150 MHz, CDCl<sub>3</sub>)** δ 152.8, 147.6, 143.7, 142.5, 135.1, 134.3, 131.4, 126.4, 124.0, 123.0, 120.7, 118.4, 109.5, 104.5, 67.4, 50.9, 50.8, 42.5, 38.7, 30.1, 26.2, 14.8; **LC/MS** 10-95% MeOH in H<sub>2</sub>O over 6 minutes, *r*<sub>t</sub> = 3.523 at 254 nM, MS (+) 417.2, 20-95% MeOH in H<sub>2</sub>O over 8 minutes, *r*<sub>t</sub> = 2.459 at 254 nM, MS (+) 417.0. **HRMS (APCI)** *m/z* calc. for C<sub>23</sub>H<sub>25</sub>O<sub>2</sub>N<sub>6</sub> [M+H]<sup>+</sup>, 417.20335 found, 417.20261.

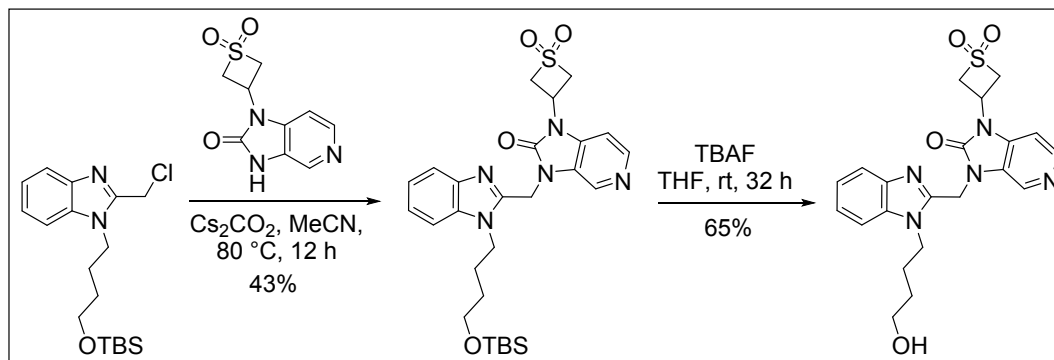

### 3-((1-(4-((Tert-butyldimethylsilyl)oxy)butyl)-1H-benzo[d]imidazol-2-yl)methyl)-1-(1,1-dioxidothietan-3-yl)-1,3-dihydro-2H-imidazo[4,5-c]pyridin-2-one (16)

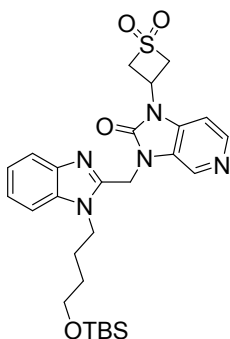

A 100 mL Schlenk tube equipped with a magnetic stirrer and cold finger condenser was charged with 1-(1,1-dioxidothietan-3-yl)-1,3-dihydro-2H-imidazo[4,5-c]pyridin-2-one (150 mg, 0.627 mmol, 1 equiv.), Cs<sub>2</sub>CO<sub>3</sub> (306 mg, 0.940 mmol, 1.5 equiv.) and acetonitrile (8.0 mL) and warmed up to 80°C to dissolve the starting material. The heating was removed and 1-(4-((*tert*-butyldimethylsilyl)oxy)butyl)-2-(chloromethyl)-1H-benzo[d]imidazole (266 mg, 0.752 mmol, 1.2 equiv.) dissolved in 4.5 mL of acetonitrile was added. After heating at 85°C for 12 h, MeOH and DCM was added and the suspension was filtered and concentrated. The crude product was purified on silica gel column (80 g) using 5 to 30% MeOH in DCM affording 3-((1-(4-((*tert*-butyldimethylsilyl)oxy)butyl)-1H-benzo[d]imidazol-2-yl)methyl)-1-(1,1-dioxidothietan-3-yl)-1,3-dihydro-2H-imidazo[4,5-c]pyridin-2-one (150 mg, 43%) as a beige solid. <sup>1</sup>H NMR (400 MHz, CDCl<sub>3</sub>) δ 8.81 (d, *J* = 0.8 Hz, 1H), 8.42 (d, *J* = 5.4 Hz, 1H), 7.77 – 7.72 (m, 1H), 7.39 – 7.34 (m, 2H), 7.31 – 7.24 (m, 2H), 5.45 – 5.37 (m, 1H), 5.38 (s, 2H), 4.95 – 4.88 (m, 2H), 4.64 – 4.56 (m, 2H), 4.34 (t, *J* = 7.5 Hz, 2H), 3.61 (t, *J* = 6.0 Hz, 2H), 1.86 – 1.76 (m, 2H), 1.58 – 1.49 (m, 2H), 0.86 (s, 9H), 0.02 (s, 6H). <sup>13</sup>C NMR (151 MHz, CDCl<sub>3</sub>) δ 152.4, 147.1, 144.4, 142.4, 135.3, 133.0, 131.9, 126.5, 123.6, 122.7, 120.3, 110.2, 103.7, 68.8, 62.4, 44.1, 38.8, 33.5, 29.9, 26.9, 26.0, 18.4, -5.2. LC-MS (ESI-API, 254 nm) 75-95 % MeOH in H<sub>2</sub>O (0.1% HCO<sub>2</sub>H), 3 min, 1.00 mL/min, C18 (Agilent Zorbax XDB-18, 50 mm x 4.6 mm, 3.5 μm), *m/z* = 556.2 (M + H), 278.6 (M/2 + H), *t* = 1.523 min, 93 % purity. HRMS (ESI+) *m/z*: [M + H]<sup>+</sup> Calcd for C<sub>27</sub>H<sub>38</sub>N<sub>5</sub>O<sub>4</sub>SSi 556.2408; Found 556.2400, error -1.5 ppm. *Mp* = 157-159.5°C.

### 1-(1,1-Dioxidothietan-3-yl)-3-((1-(4-hydroxybutyl)-1H-benzo[d]imidazol-2-yl)methyl)-1,3-dihydro-2H-imidazo[4,5-c]pyridin-2-one (3)

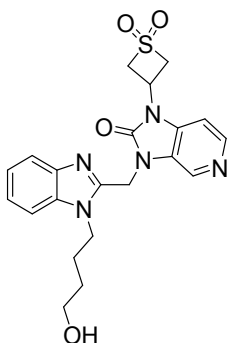

A 20 mL vial equipped with magnetic stir bar was charged with 3-((1-(4-((*tert*-butyldimethylsilyl)oxy)butyl)-1H-benzo[d]imidazol-2-yl)methyl)-1-(1,1-dioxidothietan-3-yl)-1,3-dihydro-2H-imidazo[4,5-c]pyridin-2-one (110 mg, 0.198 mmol, 1 equiv.) dissolved in THF (2.0 mL). Then 1 M TBAF in THF (0.59 mL, 0.594 mmol, 3 equiv.) was added and the mixture was stirred at rt for 32 h. Then reaction mixture was quenched by addition of water and the product was extracted with chloroform (4x), washed with water and dried over Na<sub>2</sub>SO<sub>4</sub>. The organics were concentrated and the crude product (105 mg) was recrystallized to afford 1-(1,1-dioxidothietan-3-yl)-3-((1-(4-hydroxybutyl)-1H-benzo[d]imidazol-2-yl)methyl)-1,3-dihydro-2H-imidazo[4,5-c]pyridin-2-one (57.0 mg, 65%) as light brown crystals. <sup>1</sup>H NMR (400 MHz, DMSO-*d*<sub>6</sub>) δ 8.50 (s, 1H), 8.30 (dd, *J* = 5.4, 0.8 Hz, 1H), 7.58 (d, *J* = 8.6 Hz, 2H), 7.53 (d, *J* =

5.5 Hz, 1H), 7.29 – 7.20 (m, 1H), 7.22 – 7.12 (m, 1H), 5.51 – 5.39 (m, 1H), 5.44 (s, 2H), 5.00 (dd,  $J = 14.9, 7.1$  Hz, 2H), 4.68 (dd,  $J = 14.3, 10.5$  Hz, 2H), 4.48 (t,  $J = 5.2$  Hz, 1H), 4.36 (t,  $J = 7.5$  Hz, 2H), 3.40 (q,  $J = 6.4$  Hz, 1H), 1.70 (p,  $J = 7.7$  Hz, 2H), 1.45 (p,  $J = 6.4$  Hz, 2H).  **$^{13}\text{C}$  NMR (100 MHz, DMSO- $d_6$ )**  $\delta$  152.01, 148.54, 142.85, 141.86, 135.24, 134.19, 130.07, 126.43, 122.48, 121.71, 119.08, 110.54, 104.39, 68.25, 60.24, 43.23, 37.79, 33.60, 29.55, 26.36. **HRMS (ESI+)** calcd. for  $\text{C}_{21}\text{H}_{24}\text{N}_5\text{O}_4\text{S}$  ( $[\text{M}+\text{H}]^+$ ): 442.1544. Found: 442.1537, error 0.7 ppm. **LC-MS (ESI-API, 254 nm)** 50-95 % MeOH in  $\text{H}_2\text{O}$  (0.1%  $\text{HCO}_2\text{H}$ ), 6 min, 1.00 mL/min, C18 (Agilent Zorbax XDB-18, 50 mm x 4.6 mm, 3.5  $\mu\text{m}$ ),  $m/z = 442.0$  (M + H),  $t = 0.579$  min. **Mp** = 211-214°C.

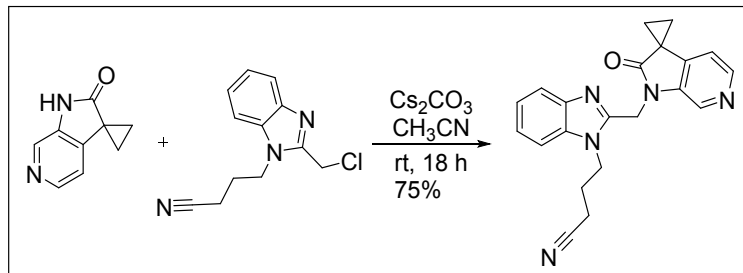

#### 4-(2-((2'-oxospiro[cyclopropane-1,3'-pyrrolo[2,3-c]pyridin]-1'(2'H)-yl)methyl)-1H-benzo[d]imidazol-1-yl)butanenitrile (4)

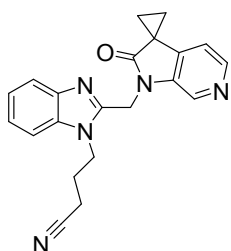

To a solution of spiro[cyclopropane-1,3'-pyrrolo[2,3-c]pyridin]-2'(1'H)-one (100 mg, 0.624 mmol) and 4-(2-(chloromethyl)-1H-benzo[d]imidazol-1-yl)butanenitrile (0.146 g, 0.624 mmol) in  $\text{CH}_3\text{CN}$  (4.2 mL) was added  $\text{Cs}_2\text{CO}_3$  at rt. The reaction was stirred at rt and followed by TLC (18 h to completion). The reaction mixture was filtered and washed with MeOH (~50 mL). The filtrate was concentrated in vacuo. The residue was purified by combiflash (0 to 10% MeOH in DCM) to give the desired compound as a beige solid (0.167 g, 75% yield).  **$^1\text{H}$  NMR (400 MHz,  $\text{CDCl}_3$ )**  $\delta$  8.82 (s, 1H), 8.34 (d,  $J = 4.8$  Hz, 1H), 7.81 – 7.76 (m, 1H), 7.38 – 7.27 (m, 3H), 6.82 (d,  $J = 5.2$  Hz, 1H), 5.33 (s, 2H), 4.41 (t,  $J = 7.6$  Hz, 2H), 2.43 (t,  $J = 7.2$  Hz, 2H), 2.06 – 1.99 (m, 2H), 1.94 – 1.91 (m, 2H), 1.74 – 1.71 (m, 2H).  **$^{13}\text{C}$  NMR (100 MHz,  $\text{CDCl}_3$ )**  $\delta$  175.6, 147.6, 144.8, 142.3, 139.5, 135.0, 131.2, 123.8, 122.9, 120.4, 118.5, 113.5, 109.5, 42.4, 38.1, 27.2, 6.0, 20.8, 14.7. **HRMS (ESI+)**  $m/z$  calculated for  $\text{C}_{21}\text{H}_{20}\text{N}_5\text{O}$  ( $[\text{M}+\text{H}]^+$ ): 358.16624, found: 358.16575. **LCMS (ESI)** 10–95% MeOH in  $\text{H}_2\text{O}$  (0.1 %  $\text{HCO}_2\text{H}$ ), 10 min,  $r_t = 4.338$ ,  $m/z = 358.2$  [ $\text{M} + \text{H}$ ] $^+$ .

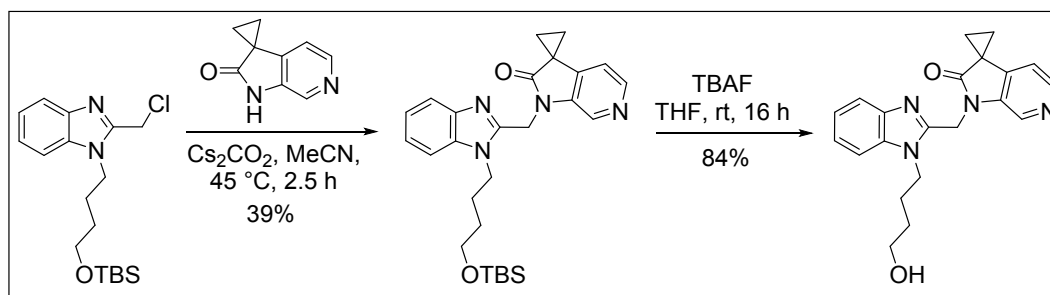

#### 1'-((1-(4-((tert-butyldimethylsilyl)oxy)butyl)-1H-benzo[d]imidazol-2-yl)methyl)spiro[cyclopropane-1,3'-pyrrolo[2,3-c]pyridin]-2'(1'H)-one (22)

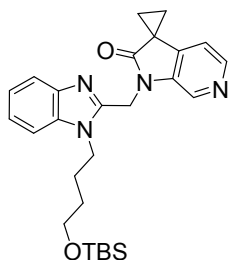

An oven-dried 50 mL RB flask was charged with Ar(g), spiro[cyclopropane-1,3'-pyrrolo[2,3-c]pyridin]-2'(1'H)-one (0.1 g, 0.62 mmol) and anhydrous acetonitrile (2.5 mL) to give a brown suspension; 1-(4-((tert-butyldimethylsilyl)oxy)butyl)-2-(chloromethyl)-1H-benzo[d]imidazole (1.4 mL, 0.56 mmol) was then added as a



0.45 M solution in anhydrous acetonitrile, followed by cesium carbonate (0.2 g, 0.61 mmol). The reaction stirred at 45 °C for 2.5 hours when TLC (5% methanol in DCM) showed complete conversion of the starting chloride to a more polar fluorescent spot with some pyrrolidinone remaining. The reaction mixture was filtered and rinsed with MeOH before the filtrate was adsorbed onto 3 g of Celite and purified via silica gel flash column chromatography (0-10% MeOH in DCM) to afford the desired product (0.103 g, 39% yield). **<sup>1</sup>H NMR (600 MHz, CDCl<sub>3</sub>)** δ 8.73 (s, 1H), 8.28 (d, *J* = 4.8 Hz, 1H), 7.76 – 7.73 (m, 1H), 7.33 – 7.30 (m, 1H), 7.25 – 7.22 (m, 2H), 6.75 (dd, *J* = 4.8, 0.6 Hz, 1H), 5.31, (s, 2H), 4.26 (t, *J* = 7.8 Hz, 2H), 3.56 (t, *J* = 6.6 Hz), 1.88 (dd, *J* = 7.8, 4.2 Hz, 2H), 1.72 – 1.67 (m, 2H), 1.65 (dd, *J* = 7.8, 4.2 Hz, 2H), 1.54 – 1.49 (m, 2H), 0.84 (s, 9H), – 0.02 (s, 6H) ppm; **<sup>13</sup>C NMR (150 MHz, CDCl<sub>3</sub>)** δ 175.4, 147.8, 144.7, 142.5, 139.6, 139.5, 135.5, 131.4, 123.3, 122.4, 120.3, 113.4, 110.1, 62.5, 44.0, 38.3, 29.9, 27.2, 26.7, 26.0, 20.7, 18.4, -5.2 ppm; **HRMS (ESI+)** *m/z*: [M + Na]<sup>+</sup> Calcd for C<sub>27</sub>H<sub>36</sub>N<sub>4</sub>O<sub>2</sub>SiNa 499.2500; Found 499.2497.

### 1'-((1-(4-hydroxybutyl)-1*H*-benzo[d]imidazol-2-yl)methyl)spiro[cyclopropane-1,3'-pyrrolo[2,3-*c*]pyridin]-2'(1'*H*)-one (5)

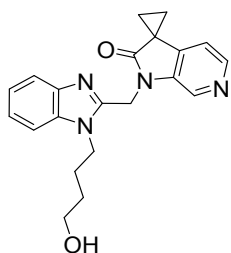

To a stirring solution of 1'-((1-(4-((*tert*-butyldimethylsilyl)oxy)butyl)-1*H*-benzo[d]imidazol-2-yl)methyl)spiro[cyclopropane-1,3'-pyrrolo[2,3-*c*]pyridin]-2'(1'*H*)-one (0.15 g, 0.315 mmol) in anhydrous THF (1.6 mL) was dropwise added tetra-*n*-butylammonium fluoride (0.50 mL, 0.50 mmol) as a 1.0 M solution in THF under Ar(g), and the reaction stirred at ambient temperature overnight. The following morning, the remaining beige solid was dissolved in MeOH, adsorbed onto 1.7 g Celite and purified via silica gel flash column chromatograph (0-20% MeOH in DCM). The relevant fractions were combined and concentrated to 0.1 g of white solid which was subsequently washed with deionized H<sub>2</sub>O, collected and dried *in vacuo* to afford the desired final compound (96 mg, 84% yield). **<sup>1</sup>H NMR (500 MHz, DMSO-*d*<sub>6</sub>)** δ 8.42 (s, 1H), 8.25 (d, *J* = 5.0 Hz, 1H), 7.60 (d, *J* = 8.0 Hz, 1H), 7.56 (d, *J* = 8.0 Hz, 1H), 7.26 – 7.22 (m, 1H), 7.19 – 7.16 (m, 2H), 5.35 (s, 2H), 4.47 (t, *J* = 5.0 Hz, 1H), 4.31 (t, *J* = 8.0 Hz, 2H), 3.39 (dd, *J* = 11.5, 6.0 Hz, 2H), 1.85 (dd, *J* = 8.5, 4.5 Hz, 2H), 1.72 (dd, *J* = 7.5, 3.0 Hz, 2H), 1.68 – 1.62 (m, 2H), 1.48 – 1.42 (m, 2H) ppm; **<sup>13</sup>C NMR (125 MHz, DMSO-*d*<sub>6</sub>)** δ 174.8, 148.6, 143.7, 141.9, 139.4, 139.1, 135.2, 130.0, 122.4, 121.7, 119.1, 114.5, 110.5, 60.3, 43.2, 37.1, 29.5, 26.8, 26.3, 20.0 (x2) ppm. **HRMS (ESI+)** *m/z*: [M + Na]<sup>+</sup> Calcd for C<sub>21</sub>H<sub>21</sub>DN<sub>4</sub>O<sub>2</sub>Na 386.1698; Found 386.1692. **LCMS (ESI)** 25–95% MeOH in H<sub>2</sub>O (0.1 % HCO<sub>2</sub>H), 6 min, *rt* = 2.412, *m/z* = 363.2 [M + H]<sup>+</sup>.

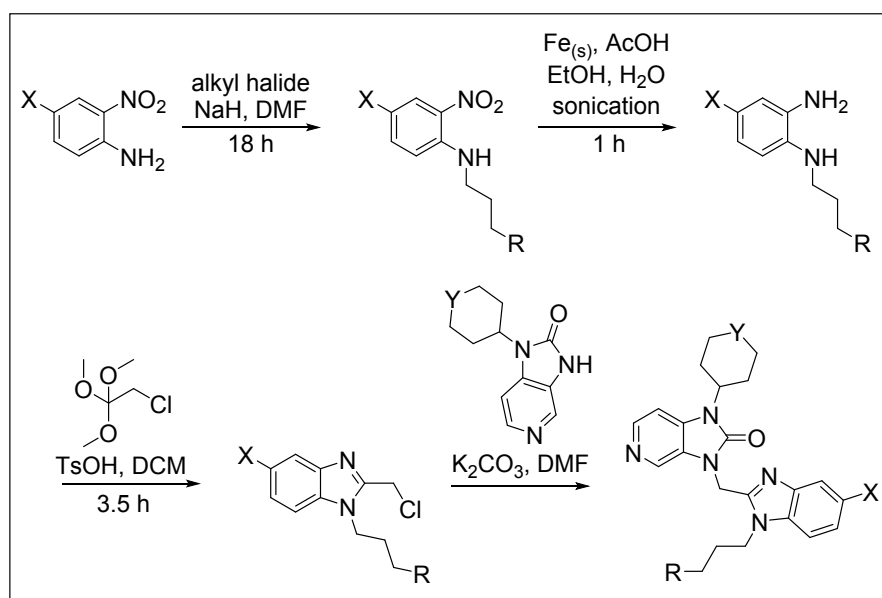

#### 4-(4-Bromo-2-nitro-anilino)butanenitrile (26)

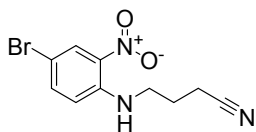

In a three-necked 100 mL round-bottomed flask, sodium hydride (60% dispersion in mineral oil, 277 mg, 6.91 mmol, 1.5 eq) was added to a solution of 4-bromo-2-nitroaniline (1.0 g, 4.6 mmol, 1.0 eq) in DMF (20 mL) at 0°C. After approximately 30 minutes at 0°C, the appropriate 4-bromobutyronitrile (1.02 g, 6.91 mmol, 1.5 eq) was added to the reaction mixture dropwise and the reaction was allowed to warm to room temperature overnight. For the workup, the reaction was quenched with a solution of saturated ammonium chloride and then extracted three times with EtOAc. The organic phases were subsequently combined, dried over MgSO<sub>4</sub> and concentrated in vacuo. The resulting crude material was then purified by column chromatography to yield the product (399 mg, 1.40 mmol, 31%) as an orange solid. **<sup>1</sup>H NMR (500 MHz, CDCl<sub>3</sub>)** δ 8.33 (d, *J* = 2.4 Hz, 1H), 8.01 (s, 1H), 7.54 (dd, *J* = 9.1, 2.3 Hz, 1H), 6.79 (d, *J* = 9.1 Hz, 1H), 3.54 – 3.47 (m, 2H), 2.53 (t, *J* = 6.9 Hz, 2H), 2.13 – 2.04 (m, 2H). **<sup>13</sup>C NMR (151 MHz, CDCl<sub>3</sub>)** δ 144.0, 139.3, 132.9, 129.3, 118.6, 115.3, 107.4, 41.6, 24.9, 15.1. **HRMS** calc. for C<sub>10</sub>H<sub>11</sub>BrN<sub>3</sub>O<sub>2</sub> [M+H]<sup>+</sup>, 284.00292 found, 284.00322.

#### 4-(4-Chloro-2-nitro-anilino)butanenitrile (27)

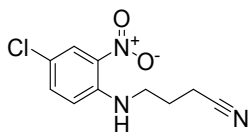

In a three-necked 100 mL round-bottomed flask, sodium hydride (60% dispersion in mineral oil, 209 mg, 5.22 mmol, 1.5 eq) was added to a solution of 4-chloro-2-nitroaniline (600 mg, 3.48 mmol, 1.0 eq) in DMF (20 mL) at 0°C. After approximately 30 minutes at 0°C, the appropriate 4-bromobutyronitrile (772 mg, 5.22 mmol, 1.5 eq) was added to the reaction mixture dropwise and the reaction was allowed to warm to room temperature overnight. For the workup, the reaction was quenched with a solution of saturated ammonium chloride and then extracted three times with EtOAc. The organic phases were subsequently combined, dried over MgSO<sub>4</sub> and concentrated in vacuo. The resulting crude material was then purified by column chromatography to yield the product (218 mg, 0.910 mmol, 26%) as an orange solid. **<sup>1</sup>H NMR (500 MHz, CDCl<sub>3</sub>)** δ 8.16 (d, *J* = 2.5 Hz, 1H), 8.00 (s, 1H), 7.43 – 7.40 (m, 1H), 6.84 (d, *J* = 9.2 Hz, 1H), 3.53 – 3.47 (m, 2H), 2.53 (t, *J* = 7.0 Hz, 2H), 2.08 (p, *J* = 6.9 Hz, 2H). **<sup>13</sup>C NMR (151 MHz, CDCl<sub>3</sub>)** δ 143.6, 136.7, 132.2, 126.3, 121.0, 118.7, 115.0, 41.5, 24.9, 15.1. **HRMS** (APCI) *m/z* calc. for C<sub>10</sub>H<sub>11</sub>O<sub>2</sub>N<sub>3</sub><sup>35</sup>Cl [M+H]<sup>+</sup>, 240.05343 found, 240.05321.

#### 4-(4-Fluoro-2-nitro-anilino)butanenitrile (28)

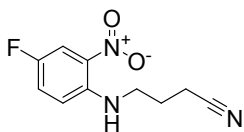

In a three-necked 100 mL round-bottomed flask, sodium hydride (60% dispersion in mineral oil, 384 mg, 9.61 mmol, 1.5 eq) was added to a solution of 4-fluoro-2-nitroaniline (1.0 g, 6.4 mmol, 1.0 eq) in DMF (20 mL) at 0°C. After approximately 30 minutes at 0°C, the appropriate 4-bromobutyronitrile (0.96 mL, 9.61 mmol, 1.5 eq) was added to the reaction mixture dropwise and the reaction was allowed to warm to room temperature overnight. For the workup, the reaction was quenched with a solution of saturated ammonium chloride and then extracted three times with EtOAc. The organic phases were subsequently combined, dried over MgSO<sub>4</sub> and concentrated in vacuo. The resulting crude material was then purified by column chromatography to yield the product (210 mg, 0.94 mmol, 15%) as an orange solid. **<sup>1</sup>H NMR (600 MHz, CDCl<sub>3</sub>)** δ 7.92 – 7.87 (m, 2H), 7.31 – 7.27 (m, 1H), 6.86 (dd, *J* = 9.4, 4.5 Hz, 1H), 3.53 – 3.49 (m, 2H), 2.53 (t, *J* = 7.0 Hz, 2H), 2.09 (p, *J* = 6.9 Hz, 2H). **<sup>13</sup>C NMR (151 MHz, CDCl<sub>3</sub>)** δ 152.8 (d, *J*<sub>CF</sub> = 239.2 Hz), 142.1, 131.3 (d, *J*<sub>CF</sub> = 8.3 Hz), 125.3 (d, *J*<sub>CF</sub> = 23.7 Hz), 118.8, 114.9 (d, *J*<sub>CF</sub> = 7.2 Hz), 112.5 (d, *J*<sub>CF</sub> = 26.2 Hz), 41.6, 24.9, 15.0. **HRMS** (APCI) *m/z* calc. for C<sub>10</sub>H<sub>11</sub>O<sub>2</sub>N<sub>3</sub>F [M+H]<sup>+</sup>, 224.08298 found, 224.08275.

#### 4-Bromo-N-(3-methylsulfonylpropyl)-2-nitroaniline (29)

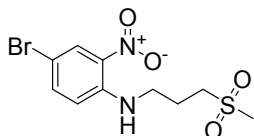

In a three-necked 100 mL round-bottomed flask, sodium hydride (60% dispersion in mineral oil, 111 mg, 2.77 mmol, 1.5 eq) was added to a solution of 4-bromo-2-nitroaniline (400 mg, 1.84 mmol, 1.0 eq) in DMF (10 mL) at 0°C. After approximately 30 minutes at 0°C, 1-bromo-3-methylsulfonylpropane (556 mg, 2.77 mmol) was added to the reaction mixture dropwise and the reaction was allowed to warm to room temperature overnight. For the workup, the reaction was quenched with a solution of saturated ammonium chloride and then extracted three times with EtOAc. The organic phases were subsequently combined, dried over MgSO<sub>4</sub> and concentrated in vacuo. The resulting crude material was then purified by column chromatography to yield the product (316 mg, 0.937 mmol, 51%) as an orange solid. <sup>1</sup>H NMR (500 MHz, CDCl<sub>3</sub>) δ 8.31 (d, *J* = 2.4 Hz, 1H), 8.07 (s, 1H), 7.53 (dd, *J* = 9.2, 2.2 Hz, 1H), 6.81 (d, *J* = 9.1 Hz, 1H), 3.59 – 3.53 (m, 2H), 3.15 (t, *J* = 7.3 Hz, 2H), 2.97 (s, 3H), 2.31 – 2.23 (m, 2H). <sup>13</sup>C NMR (151 MHz, CDCl<sub>3</sub>) δ 144.0, 139.4, 132.8, 129.3, 115.4, 107.3, 51.8, 41.4, 21.9. HRMS (APCI) *m/z* calc. for C<sub>10</sub>H<sub>14</sub>O<sub>4</sub>N<sub>2</sub><sup>79</sup>Br<sup>32</sup>S [M+H]<sup>+</sup>, 336.98522 found, 336.98471.

#### 4-Bromo-2-nitro-N-(4,4,4-trifluorobutyl)aniline (30)

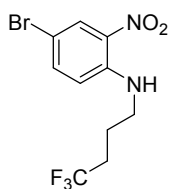

Into a 2 neck round bottom flask was placed the 4-bromo-2-nitroaniline (2.00 g, 9.22 mmol) followed by DMF (50 ml), thus forming a bright orange solution. This was cooled to 0 °C using an ice bath and then sodium hydride (553 mg, 13.8 mmol) was added in portions against a flow of argon. The reaction mixture turned dark purple upon the addition of sodium hydride. The reaction was left to proceed under argon for 30 min at 0 °C. After this time the 1,1,1-trifluoro-4-iodo-butane (3.29 g, 13.8 mmol, 1.83 ml) was added in one portion and the reaction was left for 18 h, over which time it warmed to room temperature. After this time, the reaction mixture was diluted with ethyl acetate (200 ml) and saturated sodium bicarbonate solution (150 ml). After thoroughly mixing the phases the organic phase was separated and the aqueous phase was extracted twice more with EtOAc (2 x 100 ml). The combined organic fractions were washed with brine, and then dried over anhydrous magnesium sulfate. After concentration in vacuo, the crude material was purified by column chromatography (EtOAc/Hex) to afford the title compound as an orange oil, which became a waxy solid after 24 h (2.71 g, 8.29 mmol, 90%). <sup>1</sup>H NMR (600 MHz, CDCl<sub>3</sub>) δ 8.32 (d, *J* = 2.4 Hz, 1H), 8.02 (s, 1H), 7.52 (dd, *J* = 9.2, 2.4 Hz, 1H), 6.75 (d, *J* = 9.1 Hz, 1H), 3.41 (q, *J* = 6.7 Hz, 2H), 2.50 – 2.13 (m, 2H), 2.00 (p, *J* = 7.3 Hz, 2H). <sup>13</sup>C NMR (151 MHz, CDCl<sub>3</sub>) δ 144.0, 139.1, 132.5, 129.1, 126.8 (q, *J*<sub>C-F</sub> = 276.4 Hz) 115.2, 106.9, 41.8, 31.3 (q, *J*<sub>C-F</sub> = 29.4 Hz), 21.7. <sup>19</sup>F NMR (376 MHz, CDCl<sub>3</sub>) δ -66.00 (t, *J* = 10.7 Hz). HRMS calc. for C<sub>10</sub>H<sub>11</sub><sup>79</sup>BrF<sub>3</sub>N<sub>2</sub>O<sub>2</sub> [M+H]<sup>+</sup>, 326.99505 found, 326.99481

#### 4-Bromo-N-(4-((*tert*-butyldimethylsilyloxy)butyl)-2-nitroaniline (31)

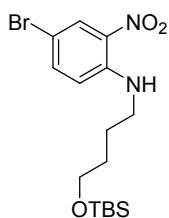

Into a 2 neck round bottom flask was placed the 4-bromo-2-nitroaniline (3.00 g, 13.8 mmol) followed by DMF (50 ml), thus forming a bright orange solution. This was cooled to 0 °C using an ice bath and then sodium hydride (0.829 g, 20.7 mmol) was added in one portion against a flow of argon. The reaction mixture turned dark purple upon the addition of sodium hydride. The reaction was left to proceed under argon for 30 min at 0 °C. After this time the *tert*-butyl(4-iodobutoxy)dimethylsilane (6.52 g, 20.7 mmol, 5.37 ml) was added in one portion and the reaction was left for 18 h, over which time it warmed to room temperature. After this time, the reaction mixture was diluted with ethyl acetate (150 ml) and saturated sodium bicarbonate solution (150 ml). After thoroughly mixing the phases the organic phase was separated and the aqueous phase was extracted twice more with EtOAc (2 x 100 ml). The combined organic fractions were washed with brine, and then dried over anhydrous magnesium sulfate. After concentration

in vacuo, the crude material was purified by column chromatography (EtOAc/Hex) to afford the title compound as an orange oil (4.86 g, 12.1 mmol, 87%).  $^1\text{H NMR}$  (600 MHz,  $\text{CDCl}_3$ )  $\delta$  8.28 (d,  $J = 2.4$  Hz, 1H), 8.07 – 7.99 (m, 1H), 7.47 – 7.44 (m, 1H), 6.76 (d,  $J = 9.2$  Hz, 1H), 3.67 (t,  $J = 6.1$  Hz, 2H), 3.32 (td,  $J = 7.1, 5.2$  Hz, 2H), 1.83 – 1.75 (m, 2H), 1.68 – 1.61 (m, 2H), 0.89 (s, 9H), 0.05 (s, 6H).  $^{13}\text{C NMR}$  (151 MHz,  $\text{CDCl}_3$ )  $\delta$  144.4, 138.8, 132.0, 128.8, 115.5, 106.1, 62.4, 43.0, 30.0, 25.9, 25.5, 18.2, -5.4. HRMS calc. for  $\text{C}_{16}\text{H}_{28}^{79}\text{BrN}_2\text{O}_3\text{Si}$   $[\text{M}+\text{H}]^+$ , 403.10471 found, 403.10452.

#### 4-(2-Amino-4-bromo-anilino)butanenitrile (32)

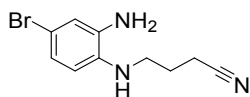

Iron powder (392 mg, 7.02 mmol, 5 eq) was suspended in a solution of 4-(4-bromo-2-nitro-anilino)butanenitrile (399 mg, 1.40 mmol, 1 eq) in ethanol (3 mL), acetic acid (3 mL) and water (1.5 mL) in a single-necked 25 mL round bottomed flask. The flask was subsequently placed in a sonicator and irradiated at room temperature for 1 hour. Once TLC confirmed that all starting material had been consumed the iron powder was filtered off over celite and the resulting filtrate was basified with a 1M solution of NaOH. The crude product was then extracted from the basic solution into DCM three times. The organic phases were combined, dried over  $\text{MgSO}_4$  and concentrated in vacuo. The resulting crude material was then purified by column chromatography to yield the product (240 mg, 0.944 mmol, 67%) as a pale orange solid.  $^1\text{H NMR}$  (500 MHz,  $\text{CDCl}_3$ )  $\delta$  6.90 (dd,  $J = 8.3, 2.2$  Hz, 1H), 6.84 (d,  $J = 2.2$  Hz, 1H), 6.50 (d,  $J = 8.4$  Hz, 1H), 3.39 (s, 3H), 3.26 (t,  $J = 6.6$  Hz, 2H), 2.49 (t,  $J = 7.0$  Hz, 2H), 2.03 – 1.95 (m, 2H).  $^{13}\text{C NMR}$  (126 MHz,  $\text{CDCl}_3$ )  $\delta$  136.4, 136.0, 123.1, 119.7, 119.2, 113.3, 111.4, 42.8, 25.2, 15.2. HRMS calc. for  $\text{C}_{10}\text{H}_{13}\text{BrN}_3$   $[\text{M}+\text{H}]^+$ , 254.02874 found, 254.02899.

#### 4-(2-Amino-4-chloro-anilino)butanenitrile (33)

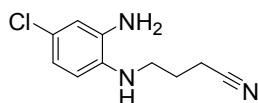

Iron powder (303 mg, 5.42 mmol, 5 eq) was suspended in a solution of 4-(4-chloro-2-nitro-anilino)butanenitrile (260 mg, 1.09 mmol, 1 eq) in ethanol (3 mL), acetic acid (3 mL) and water (1.5 mL) in a single-necked 25 mL round bottomed flask. The flask was subsequently placed in a sonicator and irradiated at room temperature for 1 hour. Once TLC confirmed that all starting material had been consumed the iron powder was filtered off over celite and the resulting filtrate was basified with a 1M solution of NaOH. The crude product was then extracted from the basic solution into DCM three times. The organic phases were combined, dried over  $\text{MgSO}_4$  and concentrated in vacuo. The resulting crude material was then employed for the subsequent step without further purification.  $^1\text{H NMR}$  (400 MHz,  $\text{CDCl}_3$ )  $\delta$  6.76 (dd,  $J = 8.3, 2.3$  Hz, 1H), 6.70 (d,  $J = 2.3$  Hz, 1H), 6.54 (d,  $J = 8.4$  Hz, 1H), 3.40 (s, 3H), 3.25 (t,  $J = 6.6$  Hz, 2H), 2.49 (t,  $J = 7.0$  Hz, 2H), 1.98 (t,  $J = 6.8$  Hz, 2H). HRMS (APCI)  $m/z$  calc. for  $\text{C}_{10}\text{H}_{13}\text{N}_3^{35}\text{Cl}$   $[\text{M}+\text{H}]^+$ , 210.07925 found, 210.07923.

#### 4-(2-Amino-4-fluoro-anilino)butanenitrile (34)

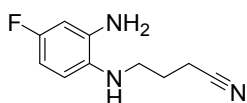

Iron powder (213 mg, 3.81 mmol, 5 eq) was suspended in a solution of 4-(4-fluoro-2-nitro-anilino)butanenitrile (170 mg, 0.762 mmol, 1 eq) in ethanol (2 mL), acetic acid (2 mL) and water (1 mL) in a single-necked 25 mL round bottomed flask. The flask was subsequently placed in a sonicator and irradiated at room temperature for 1 hour. Once TLC confirmed that all starting material had been consumed the iron powder was filtered off over celite and the resulting filtrate was basified with a 1M solution of NaOH. The crude product was then extracted from the basic solution into DCM three times. The organic phases were combined, dried over  $\text{MgSO}_4$  and concentrated in vacuo. The resulting crude material was then purified by column chromatography to yield the product (70 mg, 0.36 mmol, 48%) as a pale orange solid.  $^1\text{H NMR}$  (500 MHz,  $\text{CDCl}_3$ )  $\delta$  6.59 – 6.55 (m, 1H), 6.49 – 6.43 (m, 2H), 3.33 (s, 3H), 3.21 (t,  $J = 6.5$  Hz, 2H), 2.49 (t,  $J = 7.0$  Hz, 2H), 1.97 (p,  $J = 6.8$  Hz, 2H).

<sup>13</sup>C NMR (126 MHz, CDCl<sub>3</sub>) δ 157.6 (d, *J*<sub>CF</sub> = 236.5 Hz), 137.6 (d, *J*<sub>CF</sub> = 10.3 Hz), 132.1 (d, *J*<sub>CF</sub> = 2.0 Hz), 119.8, 113.9 (d, *J*<sub>CF</sub> = 9.6 Hz), 105.3 (d, *J*<sub>CF</sub> = 21.7 Hz), 103.3 (d, *J*<sub>CF</sub> = 25.7 Hz), 43.5, 25.3, 15.1. HRMS (APCI) *m/z* calc. for C<sub>10</sub>H<sub>13</sub>N<sub>3</sub>F [M+H]<sup>+</sup>, 194.1088 found, 194.10861.

#### 4-bromo-N<sup>1</sup>-(3-methylsulfonylpropyl)benzene-1,2-diamine (35)

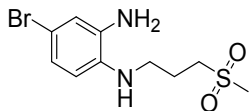

Iron powder (207 mg, 3.71 mmol, 5 eq) was suspended in a solution of 4-bromo-N-(3-methylsulfonylpropyl)-2-nitroaniline (250 mg, 0.741 mmol, 1 eq) in ethanol (2.0 mL), acetic acid (2.0 mL) and water (1.0 mL) in a single-necked 25 mL round bottomed flask. The flask was subsequently placed in a sonicator and irradiated at room temperature for 1 hour. Once TLC confirmed that all starting material had been consumed the iron powder was filtered off over celite and the resulting filtrate was basified with a 1M solution of NaOH. The crude product was then extracted from the basic solution into DCM three times. The organic phases were combined, dried over MgSO<sub>4</sub> and concentrated in vacuo. This resulted in the product (205 mg, 0.667 mmol) as a tan solid. No further purification was carried out. <sup>1</sup>H NMR (500 MHz, CDCl<sub>3</sub>) δ 6.89 (dd, *J* = 8.3, 1.8 Hz, 1H), 6.84 (d, *J* = 1.7 Hz, 1H), 6.48 (d, *J* = 8.4 Hz, 1H), 3.45 (s, 2H), 3.27 (t, *J* = 6.5 Hz, 2H), 3.18 (t, *J* = 7.4 Hz, 2H), 2.93 (s, 3H), 2.24 – 2.16 (m, 2H). <sup>13</sup>C NMR (126 MHz, CDCl<sub>3</sub>) δ 136.28, 135.95, 123.06, 119.16, 113.23, 111.26, 52.63, 42.57, 41.03, 22.26. HRMS (APCI) *m/z* calc. for C<sub>10</sub>H<sub>16</sub>O<sub>2</sub>N<sub>2</sub><sup>79</sup>Br<sup>32</sup>S [M+H]<sup>+</sup>, 307.01104 found, 307.01079.

#### 4-Bromo-N<sup>1</sup>-(4,4,4-trifluorobutyl)benzene-1,2-diamine (36)

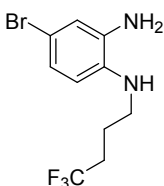

Into a one neck 250 ml round bottom flask was placed the 4-bromo-2-nitro-N-(4,4,4-trifluorobutyl)aniline (2.65 g, 8.09 mmol) followed by the ethanol (40 ml), acetic acid (40 ml) and water (20 ml), thus forming a light brown solution. To this was added the Iron (3.16 g, 56.6 mmol) and the reaction was carried out in a sonicator for 3 h. After this time, almost complete consumption of the starting material was observed by TLC analysis. The reaction mixture was then filtered through celite and diluted with Ethyl acetate (200 ml) and 1 N NaOH solution (200 ml). After thoroughly mixing the phases the organic phase was separated and the aqueous phase was further extracted with ethyl acetate (2 x 200 ml). The combined organic fractions were dried over anhydrous magnesium sulfate and then after concentration in vacuo, the crude material was purified by column chromatography to afford the title compound as a dark oil (1.99 g, 6.70 mmol, 83%). <sup>1</sup>H NMR (500 MHz, CDCl<sub>3</sub>) δ 6.90 (dd, *J* = 8.4, 2.3 Hz, 1H), 6.83 (d, *J* = 2.2 Hz, 1H), 6.48 (d, *J* = 8.4 Hz, 1H), 3.38 – 3.28 (m, 3H), 3.15 (t, *J* = 7.0 Hz, 2H), 2.31 – 2.11 (m, 2H), 1.97 – 1.82 (m, 2H). <sup>13</sup>C NMR (151 MHz, CDCl<sub>3</sub>) δ 136.2, 135.9, 127.0 (q, *J*<sub>C-F</sub> = 276.3 Hz), 123.0, 118.9, 113.0, 110.8, 42.9, 31.4 (q, *J*<sub>C-F</sub> = 29.0 Hz), 22.0 (q, *J*<sub>C-F</sub> = 2.9 Hz). <sup>19</sup>F NMR (376 MHz, CDCl<sub>3</sub>) δ -66.14 (t, *J* = 10.9 Hz). HRMS calc. for C<sub>10</sub>H<sub>13</sub>N<sub>2</sub><sup>79</sup>BrF<sub>3</sub> [M+H]<sup>+</sup>, 297.0209 found, 297.0204

#### 4-Bromo-N<sup>1</sup>-(4-((tert-butyldimethylsilyl)oxy)butyl)benzene-1,2-diamine (37)

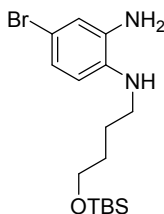

Into a 2 neck round bottom flask containing argon was placed 4-bromo-N-[4-[(tert-butyl(dimethyl)silyl]oxybutyl]-2-nitro-aniline (4.91 g, 12.2 mmol) followed by ethyl acetate (150 mL) thus forming an orange solution. To this solution was added 10% platinum on carbon (2.37 g, 1.22 mmol) in one portion and a balloon filled with hydrogen gas was fitted to the flask. After purging the flask with hydrogen the reaction was left to stir for 18 h, after which time analysis by TLC indicated that all of the starting material had been consumed and a new product had formed. The reaction mixture was then filtered through celite, concentrated in vacuo and then purified by column chromatography (EtOAc/Hex) to afford 4-bromo-N<sup>1</sup>-(4-

((*tert*-butyldimethylsilyloxy)butyl)benzene-1,2-diamine (3.18 g, 8.51 mmol, 70 % yield) as a purple oil which solidified into a waxy solid after 24 h.  $^1\text{H NMR}$  (600 MHz,  $\text{CDCl}_3$ )  $\delta$  6.90 (dd,  $J = 8.4, 2.2$  Hz, 1H), 6.81 (d,  $J = 2.2$  Hz, 1H), 6.49 (d,  $J = 8.4$  Hz, 1H), 3.68 (t,  $J = 6.1$  Hz, 2H), 3.43 – 3.22 (m, 3H), 3.08 (t,  $J = 7.0$  Hz, 2H), 1.75 – 1.69 (m, 2H), 1.68 – 1.62 (m, 2H), 0.92 (s, 9H), 0.08 (s, 6H).  $^{13}\text{C NMR}$  (151 MHz,  $\text{CDCl}_3$ )  $\delta$  136.9, 135.6, 122.9, 118.7, 112.7, 110.0, 62.8, 44.0, 30.4, 25.9, -5.3. HRMS calc. for  $\text{C}_{16}\text{H}_{30}^{79}\text{BrN}_2\text{OSi}$   $[\text{M}+\text{H}]^+$ , 373.13053, found 373.13018.

#### 4-[5-Bromo-2-(chloromethyl)benzimidazole-1-yl]butanenitrile (38)

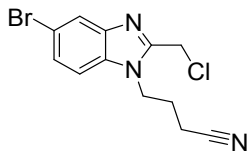

A solution of 4-(2-amino-4-bromo-anilino)butanenitrile (200 mg, 0.787 mmol, 1.0 eq), 2-chloro-1,1,1-trimethoxy-ethane (0.32 mL, 2.36 mmol, 3.0 eq) and *p*-toluenesulfonyl chloride monohydrate (15 mg, 0.079 mmol, 0.1 eq) in DCM (4 mL) was stirred vigorously at room temperature, under an atmosphere of argon for approximately 4 hours, until TLC confirmed full consumption of the starting material. The reaction was then concentrated *in vacuo* and the resulting crude product was dry-loaded onto silica gel. Purification was undertaken with column chromatography to yield the product (215 mg, 0.688 mmol, 87%) as a pale-yellow solid.  $^1\text{H NMR}$  (400 MHz,  $\text{CDCl}_3$ )  $\delta$  7.89 (d,  $J = 1.7$  Hz, 1H), 7.44 (dd,  $J = 8.6, 1.8$  Hz, 1H), 7.30 – 7.23 (m, 1H), 4.83 (s, 2H), 4.38 (t,  $J = 7.4$  Hz, 2H), 2.45 (t,  $J = 6.9$  Hz, 2H), 2.31 – 2.23 (m, 2H).  $^{13}\text{C NMR}$  (101 MHz,  $\text{CDCl}_3$ )  $\delta$  149.8, 143.6, 134.2, 127.4, 123.6, 118.4, 116.2, 110.9, 42.8, 36.6, 25.5, 15.0. HRMS calc. for  $\text{C}_{12}\text{H}_{12}\text{BrClN}_3$   $[\text{M}+\text{H}]^+$ , 311.98976 found, 311.99105.

#### 4-[5-Chloro-2-(chloromethyl)benzimidazole-1-yl]butanenitrile (39)

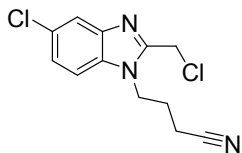

A solution of 4-(2-amino-4-chloro-anilino)butanenitrile (150 mg, 0.715 mmol, 1.0 eq), 2-chloro-1,1,1-trimethoxy-ethane (0.29 mL, 2.15 mmol, 3.0 eq) and *p*-toluenesulfonyl chloride monohydrate (14 mg, 0.072 mmol, 0.1 eq) in DCM (4 mL) was stirred vigorously at room temperature, under an atmosphere of argon for approximately 4 hours, until TLC confirmed full consumption of the starting material. The reaction was then concentrated *in vacuo* and the resulting crude product was dry-loaded onto silica gel. Purification was undertaken with column chromatography to yield the product (150 mg, 0.559 mmol, 78%) as a pale-yellow solid.  $^1\text{H NMR}$  (500 MHz,  $\text{CDCl}_3$ )  $\delta$  7.74 – 7.65 (m, 1H), 7.29 – 7.27 (m, 2H), 4.81 (s, 2H), 4.37 – 4.32 (m, 2H), 2.43 (t,  $J = 6.9$  Hz, 2H), 2.29 – 2.21 (m, 2H).  $^{13}\text{C NMR}$  (126 MHz,  $\text{CDCl}_3$ )  $\delta$  150.0, 143.1, 133.8, 128.7, 124.6, 120.3, 118.4, 110.4, 42.8, 36.5, 25.4, 14.9. HRMS (APCI)  $m/z$  calc. for  $\text{C}_{12}\text{H}_{12}\text{N}_3^{35}\text{Cl}_2$   $[\text{M}+\text{H}]^+$ , 268.04028 found, 268.04027.

#### 4-[5-Fluoro-2-(chloromethyl)benzimidazole-1-yl]butanenitrile (40)

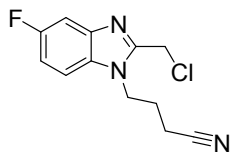

A solution of 4-(2-amino-4-fluoro-anilino)butanenitrile (240 mg, 1.24 mmol, 1.0 eq), 2-chloro-1,1,1-trimethoxy-ethane (0.50 mL, 3.7 mmol, 3.0 eq) and *p*-toluenesulfonyl chloride monohydrate (24 mg, 0.12 mmol, 0.1 eq) in DCM (6 mL) was stirred vigorously at room temperature, under an atmosphere of argon for approximately 4 hours, until TLC confirmed full consumption of the starting material. The reaction was then concentrated *in vacuo* and the resulting crude product was dry-loaded onto silica gel. Purification was undertaken with column chromatography to yield the product (80 mg, 0.32 mmol, 26%) as a pale-yellow solid.  $^1\text{H NMR}$  (500 MHz,  $\text{CDCl}_3$ )  $\delta$  7.44 (dd,  $J = 9.0, 2.4$  Hz, 1H), 7.34 (dd,  $J = 8.9, 4.4$  Hz, 1H), 7.12 (td,  $J = 9.0, 2.4$  Hz, 1H), 4.85 (s, 2H), 4.40 (t,  $J = 7.4$  Hz, 2H), 2.47 (t,  $J = 6.8$  Hz, 2H), 2.35 – 2.25 (m, 2H).  $^{13}\text{C NMR}$  (151 MHz,  $\text{CDCl}_3$ )  $\delta$  159.9 (d,  $J_{\text{CF}} = 239.4$  Hz), 150.2, 142.7 (d,  $J_{\text{CF}} = 12.6$  Hz), 131.8, 118.4, 112.9 (d,  $J_{\text{CF}} = 26.5$  Hz).

Hz), 110.1 (d,  $J_{CF} = 10.0$  Hz), 106.5 (d,  $J_{CF} = 24.1$  Hz), 42.9, 36.6, 25.6, 15.0. **HRMS** (APCI)  $m/z$  calc. for  $C_{12}H_{12}N_3^{35}ClF$   $[M+H]^+$ , 252.06983 found, 252.06965.

### 5-Bromo-2-(chloromethyl)-1-(3-methylsulfonylpropyl)benzimidazole (41)

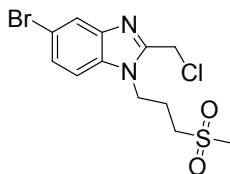

A solution of 4-bromo- $N^1$ -(3-methylsulfonylpropyl)benzene-1,2-diamine (150 mg, 0.488 mmol, 1.0 eq), 2-chloro-1,1,1-trimethoxy-ethane (0.20 mL, 1.47 mmol, 3.0 eq) and *p*-toluenesulfonyl chloride monohydrate (9.0 mg, 0.049 mmol, 0.1 eq) in DCM (3 mL) was stirred vigorously at room temperature, under an atmosphere of argon for approximately 4 hours, until TLC confirmed full consumption of the starting material.

The reaction was then concentrated *in vacuo* and the resulting crude product was dry-loaded onto silica gel. Purification was undertaken with column chromatography to yield the product (138 mg, 0.377 mmol, 77%).  **$^1H$  NMR (500 MHz,  $CDCl_3$ )**  $\delta$  7.90 (d,  $J = 1.6$  Hz, 1H), 7.44 (dd,  $J = 8.6, 1.8$  Hz, 1H), 7.32 (d,  $J = 8.6$  Hz, 1H), 4.85 (s, 2H), 4.53 – 4.40 (m, 2H), 3.09 (t,  $J = 6.9$  Hz, 2H), 2.96 (s, 3H), 2.55 – 2.35 (m, 2H).  **$^{13}C$  NMR (126 MHz,  $CDCl_3$ )**  $\delta$  149.9, 143.7, 134.2, 127.3, 123.6, 116.2, 111.2, 51.2, 42.8, 41.4, 36.6, 22.5. **HRMS** (APCI)  $m/z$  calc. for  $C_{12}H_{15}O_2N_2^{79}Br^{35}Cl^{32}S$   $[M+H]^+$ , 364.97207 found, 363.97192.

### 5-bromo-2-(chloromethyl)-1-(4,4,4-trifluorobutyl)-1H-benzo[d]imidazole (42)

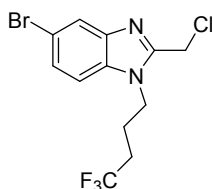

Into a 2-neck round bottom flask was added 4-bromo- $N^1$ -(4,4,4-trifluorobutyl)benzene-1,2-diamine (2.00 g, 6.73 mmol) followed by DCM, thus forming a grey solution. To this, against a flow of argon was added the 2-chloro-1,1,1-trimethoxyethane (3.12 g, 20.2 mmol, 2.72 ml) followed by the toluene sulfonic acid monohydrate (0.12 g, 0.67 mmol). The reaction was left to proceed under argon for 18 h after which time analysis by TLC confirmed that all of the starting material had reacted and that a new product had formed at slightly lower  $R_f$ . The reaction mixture was diluted with ethyl acetate (200 ml) and saturated sodium bicarbonate solution (200 ml). After thoroughly mixing the phases, the organic phase was separated and the aqueous phase was extracted twice more with ethyl acetate (2 x 100 ml). The combined organic fractions were dried over anhydrous magnesium sulfate after concentration *in vacuo*. The crude material was purified by column chromatography to afford the title compound as a white solid (1.94 g, 5.46 mmol, 81%).

**$^1H$  NMR (600 MHz,  $CDCl_3$ )**  $\delta$  7.91 (s, 1H), 7.45 (d,  $J = 8.6$  Hz, 1H), 7.22 (d,  $J = 8.6$  Hz, 1H), 4.82 (s, 2H), 4.31 (t,  $J = 7.3$  Hz, 2H), 2.31 – 2.11 (m, 4H).  **$^{13}C$  NMR (151 MHz,  $CDCl_3$ )**  $\delta$  149.6, 143.6, 134.1, 127.1, 126.5 (q,  $J_{C-F} = 276.5$  Hz), 123.5, 116.0, 110.8, 43.2, 36.5, 31.2 (q,  $J_{C-F} = 29.7$  Hz), 22.5.  **$^{19}F$  NMR (376 MHz,  $CDCl_3$ )**  $\delta$  -65.79 (t,  $J = 10.1$  Hz). **HRMS** calc. for  $C_{12}H_{12}^{79}BrClF_3N_2$   $[M+H]^+$ , 354.9891 found, 354.9819

### 5-bromo-1-(4-((tert-butyl)dimethylsilyloxy)butyl)-2-(chloromethyl)-1H-benzo[d]imidazole (43)

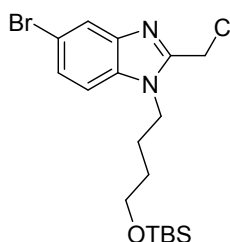

Into a 2 neck round bottom flask was added the 4-bromo- $N^1$ -[4-[(*tert*-butyl(dimethyl)silyl]oxybutyl)]benzene-1,2-diamine (3.60 g, 9.64 mmol) followed by DCM (100 ml), thus forming a pale grey solution. To this, against a flow of argon was added the 2-chloro-1,1,1-trimethoxy-ethane (4.47 g, 28.9 mmol, 3.90 ml) followed by the toluene sulfonic acid monohydrate (0.18 g, 0.96 mmol). The reaction was left to proceed under argon for 18 h after which time analysis by TLC confirmed that all of the starting material had reacted and that a new product had formed at slightly higher  $R_f$ . The reaction mixture was diluted with dichloromethane (200 ml) and saturated sodium bicarbonate solution (200 ml). After thoroughly mixing the phases, the organic phase was separated, and the aqueous phase was extracted once more with dichloromethane (100 ml). The

combined organic fractions were dried over anhydrous magnesium sulfate, filtered, and concentrated *in vacuo*. The crude material was purified by column chromatography (EtOAc/Hex) to afford the title compound as a white solid (3.69 g, 8.54 mmol, 89%). **<sup>1</sup>H NMR (600 MHz, CDCl<sub>3</sub>)** δ 7.84 (s, 1H), 7.34 (d, *J* = 8.5 Hz, 1H), 7.20 (d, *J* = 8.6 Hz, 1H), 4.77 (s, 2H), 4.20 (t, *J* = 7.7 Hz, 2H), 3.63 (t, *J* = 5.8 Hz, 2H), 1.96 – 1.88 (m, 2H), 1.61 – 1.51 (m, 2H), 0.85 (s, 9H), 0.01 (s, 6H). **<sup>13</sup>C NMR (151 MHz, CDCl<sub>3</sub>)** δ 149.7, 143.4, 134.2, 126.4, 122.9, 115.3, 111.1, 62.12, 44.3, 36.4, 29.6, 26.5, 25.8, 18.1, -5.48. **HRMS** calc. for C<sub>18</sub>H<sub>29</sub><sup>79</sup>BrClN<sub>2</sub>OSi [M+H]<sup>+</sup>, 431.09156 found, 431.09160

#### 4-[5-Bromo-2-[(2-oxo-1-tetrahydropyran-4-yl-imidazo[4,5-c]pyridin-3-yl)methyl]benzimidazol-1-yl]butanenitrile (44)

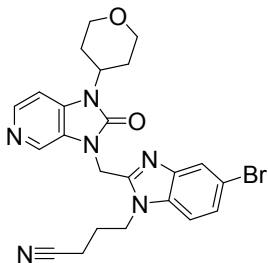

Potassium carbonate (76 mg, 0.55 mmol, 1.2 eq) and 4-[5-bromo-2-(chloromethyl)benzimidazole-1-yl]butanenitrile (171 mg, 0.547 mmol, 1.2 eq) were added to a solution of 3-tetrahydropyran-4-yl-1*H*-benzimidazol-2-one (100 mg, 0.456 mmol, 1 eq) in DMF (3.0 mL) and the reaction was heated to 50 °C. After approximately 18 hours the reaction was cooled to room temperature, quenched with a saturated solution of NH<sub>4</sub>Cl and extracted into DCM three times. The organic phases were combined, dried over MgSO<sub>4</sub> and concentrated *in vacuo*. The resulting crude material was then purified by column chromatography and then recrystallized from hot MeOH to yield the product (139 mg, 0.281 mmol, 62%) as a yellow solid. **<sup>1</sup>H NMR (500 MHz, DMSO)** δ 8.46 (s, 1H), 8.24 (d, *J* = 5.4 Hz, 1H), 7.80 (d, *J* = 1.7 Hz, 1H), 7.62 (d, *J* = 8.7 Hz, 1H), 7.45 (d, *J* = 5.4 Hz, 1H), 7.41 (dd, *J* = 8.6, 1.8 Hz, 1H), 5.46 (s, 2H), 4.54 – 4.46 (m, 1H), 4.45 – 4.38 (m, 2H), 3.99 (dd, *J* = 11.2, 4.0 Hz, 2H), 3.48 (t, *J* = 11.3 Hz, 2H), 2.62 (t, *J* = 7.4 Hz, 2H), 2.42 – 2.30 (m, 2H), 2.10 – 2.00 (m, 2H), 1.73 – 1.66 (m, 2H). **<sup>13</sup>C NMR (101 MHz, DMSO)** δ 152.3, 150.5, 143.3, 142.6, 134.4, 134.3, 129.9, 126.5, 125.3, 121.7, 120.0, 114.3, 112.3, 104.5, 66.5, 50.2, 42.4, 37.6, 29.5, 25.3, 13.9. **HRMS (APCI)** *m/z* calc. for C<sub>23</sub>H<sub>24</sub>BrN<sub>6</sub>O<sub>2</sub> [M+H]<sup>+</sup>, 495.11386 found, 495.11472. **LCMS (ESI)** 10–95% MeOH in H<sub>2</sub>O (0.1 % HCO<sub>2</sub>H), 6 min, *rt* = 4.285, *m/z* = 496.2 [M + H]<sup>+</sup>; 50–95% MeOH in H<sub>2</sub>O (0.1 % HCO<sub>2</sub>H), 6 min, *rt* = 0.959, *m/z* = 496.2 [M + H]<sup>+</sup>.

#### 4-[5-Chloro-2-[(2-oxo-1-tetrahydropyran-4-yl-imidazo[4,5-c]pyridin-3-yl)methyl]benzimidazol-1-yl]butanenitrile (45)

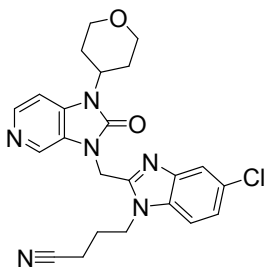

Potassium carbonate (78 mg, 0.56 mmol, 1.5 eq) and 4-[5-chloro-2-(chloromethyl)benzimidazole-1-yl]butanenitrile (150 mg, 0.561 mmol, 1.5 eq) were added to a solution of 3-tetrahydropyran-4-yl-1*H*-benzimidazol-2-one (82 mg, 0.437 mmol, 1 eq) in DMF (3.0 mL) and the reaction was heated to 50 °C. After approximately 18 hours the reaction was cooled to room temperature, quenched with a saturated solution of NH<sub>4</sub>Cl and extracted into DCM three times. The organic phases were combined, dried over MgSO<sub>4</sub> and concentrated *in vacuo*. The resulting crude material was then purified by column chromatography and then recrystallized from hot MeOH to yield the product (145 mg, 0.322 mmol, 86%) as a yellow solid. **<sup>1</sup>H NMR (500 MHz, DMSO-*d*<sub>6</sub>)** δ 8.46 (s, 1H), 8.24 (d, *J* = 5.4 Hz, 1H), 7.69 – 7.63 (m, 2H), 7.46 (dd, *J* = 5.5, 0.8 Hz, 1H), 7.30 (dd, *J* = 8.7, 1.9 Hz, 1H), 5.46 (s, 2H), 4.55 – 4.46 (m, 1H), 4.45 – 4.38 (m, 2H), 3.99 (dd, *J* = 11.4, 4.5 Hz, 2H), 3.54 – 3.43 (m, 2H), 2.63 (t, *J* = 7.4 Hz, 2H), 2.43 – 2.32 (m, 2H), 2.05 (p, *J* = 7.5 Hz, 2H), 1.74 – 1.66 (m, 2H). **<sup>13</sup>C NMR (126 MHz, DMSO-*d*<sub>6</sub>)** δ 152.3, 150.7, 142.8, 142.6, 134.3, 134.1, 129.9, 126.5, 126.4, 122.7, 119.9, 118.7, 111.8, 104.5, 66.4, 50.2, 42.3, 37.6, 29.5, 25.3, 13.9. **HRMS (APCI)** *m/z* calc. for C<sub>23</sub>H<sub>24</sub>ClN<sub>6</sub>O<sub>2</sub> [M+H]<sup>+</sup>, 451.16438 found, 451.16400. **LCMS (ESI)** 25–95% MeOH in H<sub>2</sub>O (0.1 % HCO<sub>2</sub>H), 3 min, *rt* = 2.682, *m/z* = 451.0 [M + H]<sup>+</sup>; 50–95% MeOH in H<sub>2</sub>O (0.1 % HCO<sub>2</sub>H), 3 min, *rt* = 0.872, *m/z* = 451.0 [M + H]<sup>+</sup>.



#### 4-[5-Fluoro-2-[(2-oxo-1-tetrahydropyran-4-yl-imidazo[4,5-c]pyridin-3-yl)methyl]benzimidazol-1-yl]butanenitrile (46)

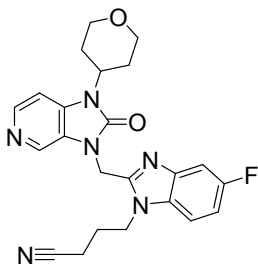

Potassium carbonate (42 mg, 0.30 mmol, 1.2 eq) and 4-[5-fluoro-2-(chloromethyl)benzimidazole-1-yl]butanenitrile (76 mg, 0.30 mmol, 1.2 eq) were added to a solution of 3-tetrahydropyran-4-yl-1*H*-benzimidazol-2-one (55 mg, 0.25 mmol, 1 eq) in DMF (1.0 mL) and the reaction was heated to 50 °C. After approximately 18 hours the reaction was cooled to room temperature, quenched with a saturated solution of NH<sub>4</sub>Cl and extracted into DCM three times. The organic phases were combined, dried over MgSO<sub>4</sub> and concentrated *in vacuo*. The resulting crude material was then purified by column chromatography and then recrystallized from hot MeOH to yield the product (20 mg, 0.046 mmol, 18%) as a yellow solid. **<sup>1</sup>H NMR (500 MHz, DMSO-*d*<sub>6</sub>)** δ 8.47 (d, *J* = 0.7 Hz, 1H), 8.24 (d, *J* = 5.4 Hz, 1H), 7.64 (dd, *J* = 8.9, 4.7 Hz, 1H), 7.46 (dd, *J* = 5.5, 0.8 Hz, 1H), 7.41 (dd, *J* = 9.9, 2.5 Hz, 1H), 7.18 – 7.12 (m, 1H), 5.44 (s, 2H), 4.50 (tt, *J* = 12.2, 4.2 Hz, 1H), 4.45 – 4.39 (m, 2H), 3.99 (dd, *J* = 11.4, 4.5 Hz, 2H), 3.48 (t, *J* = 11.0 Hz, 2H), 2.63 (t, *J* = 7.4 Hz, 2H), 2.43 – 2.31 (m, 2H), 2.05 (p, *J* = 7.5 Hz, 2H), 1.75 – 1.67 (m, 2H). **<sup>13</sup>C NMR (151 MHz, DMSO-*d*<sub>6</sub>)** δ 158.6 (d, *J*<sub>CF</sub> = 234.8 Hz), 152.2, 150.7, 142.6, 142.2 (d, *J*<sub>CF</sub> = 12.9 Hz), 134.3, 130.9 (d, *J*<sub>CF</sub> = 296.5 Hz), 126.5, 119.9, 111.2 (d, *J*<sub>CF</sub> = 10.4 Hz), 110.7 (d, *J*<sub>CF</sub> = 25.9 Hz), 104.8 (d, *J*<sub>CF</sub> = 24.1 Hz), 104.5, 66.4, 50.2, 42.3, 37.6, 29.5, 25.3, 13.9. **HRMS (APCI)** *m/z* calc. for C<sub>23</sub>H<sub>24</sub>FN<sub>6</sub>O<sub>2</sub> [M+H]<sup>+</sup>, 435.19393 found, 435.19355. **LCMS (ESI)** 25–95% MeOH in H<sub>2</sub>O (0.1 % HCO<sub>2</sub>H), 3 min, *rt* = 2.367, *m/z* = 435.2 [M + H]<sup>+</sup>; 50-95% MeOH in H<sub>2</sub>O (0.1 % HCO<sub>2</sub>H), 3 min, *rt* = 0.667, *m/z* = 435.2 [M + H]<sup>+</sup>.

#### 4-[5-Bromo-2-[[1-(1,1-dioxothian-4-yl)-2-oxo-imidazo[4,5-c]pyridin-3-yl)methyl]benzimidazol-1-yl]butanenitrile (47)

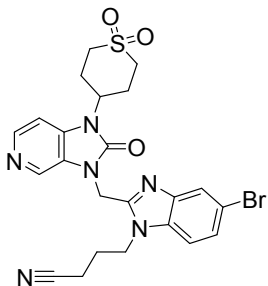

Potassium carbonate (78 mg, 0.56 mmol, 1.5 eq) and 4-[5-bromo-2-(chloromethyl)benzimidazole-1-yl]butanenitrile (175 mg, 0.561 mmol, 1.5 eq) were added to a solution of 1-(1,1-dioxothian-4-yl)-3*H*-imidazo[4,5-c]pyridin-2-one (100 mg, 0.374 mmol, 1 eq) in DMF (3.0 mL) and the reaction was heated to 50 °C. After approximately 18 hours the reaction was cooled to room temperature, quenched with a saturated solution of NH<sub>4</sub>Cl and extracted into DCM three times. The organic phases were combined, dried over MgSO<sub>4</sub> and concentrated *in vacuo*. The resulting crude material was then purified by column chromatography and then recrystallized from hot MeOH to yield the product (159 mg, 0.293 mmol, 78%) as a yellow solid. **<sup>1</sup>H NMR (500 MHz, DMSO-*d*<sub>6</sub>)** δ 8.48 (s, 1H), 8.30 (d, *J* = 5.4 Hz, 1H), 7.80 (d, *J* = 1.8 Hz, 1H), 7.63 (d, *J* = 8.7 Hz, 1H), 7.42 (dd, *J* = 8.6, 1.9 Hz, 1H), 7.30 (dd, *J* = 5.4, 0.8 Hz, 1H), 5.45 (s, 2H), 4.76 – 4.66 (m, 1H), 4.47 – 4.37 (m, 2H), 3.53 – 3.42 (m, 2H), 3.23 – 3.15 (m, 2H), 2.88 – 2.75 (m, 2H), 2.63 (t, *J* = 7.4 Hz, 2H), 2.17 – 2.04 (m, 4H). **<sup>13</sup>C NMR (126 MHz, DMSO-*d*<sub>6</sub>)** δ 152.1, 150.4, 143.3, 142.6, 134.4, 134.3, 130.1, 126.6, 125.3, 121.6, 119.9, 114.2, 112.3, 104.0, 49.4, 49.3, 42.3, 37.6, 26.9, 25.2, 13.9. **HRMS (APCI)** *m/z* calc. for C<sub>23</sub>H<sub>24</sub>BrN<sub>6</sub>O<sub>3</sub>S [M+H]<sup>+</sup>, 543.08085 found, 543.08067. **LCMS (ESI)** 25–95% MeOH in H<sub>2</sub>O (0.1 % HCO<sub>2</sub>H), 3 min, *rt* = 2.588, *m/z* = 543.0 [M + H]<sup>+</sup>; 50-95% MeOH in H<sub>2</sub>O (0.1 % HCO<sub>2</sub>H), 3 min, *rt* = 0.789, *m/z* = 453.0 [M + H]<sup>+</sup>.

### 3-[[5-Bromo-1-(3-methylsulfonylpropyl)benzimidazol-2-yl]methyl]-1-tetrahydropyran-4-yl-imidazo[4,5-c]pyridin-2-one (48)

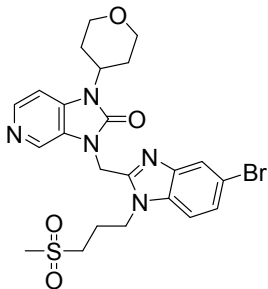

Potassium carbonate (36 mg, 0.26 mmol, 1.2 eq) and 5-bromo-2-(chloromethyl)-1-(3-methylsulfonylpropyl)benzimidazole (96 mg, 0.26 mmol, 1.2 eq) were added to a solution of 3-tetrahydropyran-4-yl-1*H*-benzimidazol-2-one (48 mg, 0.22 mmol, 1 eq) in DMF (1.0 mL) and the reaction was heated to 50 °C. After approximately 18 hours the reaction was cooled to room temperature, quenched with a saturated solution of NH<sub>4</sub>Cl and extracted into DCM three times. The organic phases were combined, dried over MgSO<sub>4</sub> and concentrated *in vacuo*. The resulting crude material was then purified by column chromatography and then recrystallized from hot MeOH to yield the product (19 mg, 0.035 mmol, 16%) as a white solid. **<sup>1</sup>H NMR (500 MHz, CDCl<sub>3</sub>)** δ 8.72 (s, 1H), 8.28 (d, *J* = 5.3 Hz, 1H), 7.86 (s, 1H), 7.34 (d, *J* = 10.0 Hz, 1H), 7.23 (d, *J* = 8.6 Hz, 1H), 7.12 (d, *J* = 5.3 Hz, 1H), 5.34 (s, 2H), 5.27 (s, 1H), 4.55 – 4.46 (m, 2H), 4.11 (dd, *J* = 11.5, 3.9 Hz, 2H), 3.52 (t, *J* = 11.6 Hz, 2H), 3.07 (t, *J* = 7.2 Hz, 2H), 2.90 (s, 3H), 2.47 – 2.34 (m, 2H), 2.29 – 2.18 (m, 2H), 1.81 – 1.73 (m, 2H). **<sup>13</sup>C NMR (126 MHz, CDCl<sub>3</sub>)** δ 152.7, 148.9, 143.6, 134.4, 134.0, 131.0, 126.9, 126.4, 123.3, 115.9, 111.1, 110.1, 104.6, 67.4, 51.2, 50.8, 42.4, 41.2, 38.4, 30.1, 22.7. **HRMS (APCI)** *m/z* calc. for C<sub>23</sub>H<sub>27</sub>BrN<sub>5</sub>O<sub>4</sub>S [M+H]<sup>+</sup>, 548.09616 found, 548.09723. **LCMS (ESI)** 10–95% MeOH in H<sub>2</sub>O (0.1 % HCO<sub>2</sub>H), 6 min, *rt* = 4.071, *m/z* = 549.2 [M + H]<sup>+</sup>; 50-95% MeOH in H<sub>2</sub>O (0.1 % HCO<sub>2</sub>H), 6 min, *rt* = 0.802, *m/z* = 549.0 [M + H]<sup>+</sup>.

### 3-((5-bromo-1-(4,4,4-trifluorobutyl)-1*H*-benzo[*d*]imidazol-2-yl)methyl)-1-(tetrahydro-2*H*-pyran-4-yl)-1,3-dihydro-2*H*-imidazo[4,5-*c*]pyridin-2-one (49)

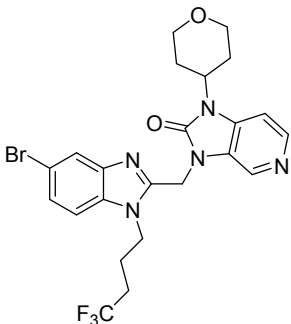

Into a two neck round bottom flask was added the 5-bromo-2-(chloromethyl)-1-(4,4,4-trifluorobutyl)-1*H*-benzo[*d*]imidazole (500 mg, 1.41 mmol) followed by the 1-(tetrahydro-2*H*-pyran-4-yl)-1,3-dihydro-2*H*-benzo[*d*]imidazol-2-one (308 mg, 1.41 mmol). To this was added DMF (15 ml) thus forming a light brown solution. Potassium carbonate (194 mg, 1.41 mmol) was then added and the reaction was carried out at 60 °C for 18 h. After this time the reaction mixture was diluted with ethyl acetate (100 ml) and water (100 ml). The phases were thoroughly mixed and after separation, the aqueous phase was extracted with ethyl acetate (2 x 100 ml). The combined organic fractions were then washed with brine (100 ml) and then dried over anhydrous magnesium sulfate. After concentrating *in vacuo*, the crude material was purified by column chromatography (DCM/MeOH) and then recrystallized from ethyl acetate/ethanol mixture, thereby affording the title compound as a white solid (641 mg, 1.19 mmol, 85%). **<sup>1</sup>H NMR (600 MHz, DMSO-*d*<sub>6</sub>)** δ 8.47 (s, 1H), 8.23 (d, *J* = 5.3 Hz, 1H), 7.81 (s, 1H), 7.65 (d, *J* = 8.6 Hz, 1H), 7.45 (d, *J* = 5.4 Hz, 1H), 7.42 (d, *J* = 8.7 Hz, 1H), 5.45 (s, 2H), 4.54 – 4.46 (m, 1H), 4.44 (t, *J* = 7.7 Hz, 2H), 3.99 (dd, *J* = 11.6, 4.4 Hz, 2H), 3.48 (t, *J* = 11.9 Hz, 2H), 2.42 – 2.31 (m, 4H), 1.96 – 1.84 (m, 2H), 1.69 (d, *J* = 11.7 Hz, 2H). **<sup>13</sup>C NMR (151 MHz, DMSO-*d*<sub>6</sub>)** δ 152.7, 151.0, 143.8, 143.1, 134.8, 130.3, 127.7 (q, *J*<sub>C-F</sub> = 276.2 Hz), 127.0, 125.9, 122.1, 114.7, 112.8, 105.0, 66.89, 50.7, 42.6, 38.1, 30.5 (q, *J*<sub>C-F</sub> = 28.4 Hz), 30.0, 22.7. **HRMS** calc. for C<sub>23</sub>H<sub>24</sub><sup>79</sup>BrF<sub>3</sub>N<sub>5</sub>O<sub>2</sub> [M+H]<sup>+</sup>, 538.1060 found, 538.1057. **LCMS (ESI)** 25–95% MeOH in H<sub>2</sub>O (0.1 % HCO<sub>2</sub>H), 6 min, *rt* = 4.645, *m/z* = 540.0 C<sub>23</sub>H<sub>24</sub><sup>81</sup>BrF<sub>3</sub>N<sub>5</sub>O<sub>2</sub> [M+H]<sup>+</sup>.

### 3-((5-Bromo-1-(4-((*tert*-butyldimethylsilyl)oxy)butyl)-1*H*-benzo[*d*]imidazol-2-yl)methyl)-1-(tetrahydro-2*H*-pyran-4-yl)-1,3-dihydro-2*H*-imidazo[4,5-*c*]pyridin-2-one (50)

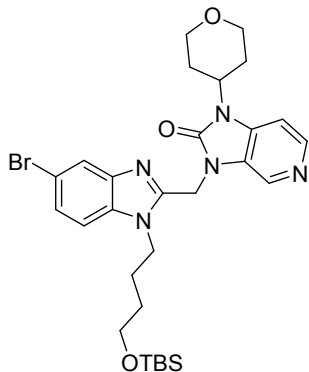

Into a two neck round bottom flask containing argon was added 4-[5-bromo-2-(chloromethyl)benzimidazol-1-yl]butoxy-*tert*-butyl-dimethyl-silane (1.00 g, 2.32 mmol) followed by 1-tetrahydropyran-4-yl-3*H*-imidazo[4,5-*c*]pyridin-2-one (508 mg, 2.32 mmol). To this was added DMF (15 ml) thus forming a light brown solution. Potassium carbonate (320 mg, 2.32 mmol) was then added and the reaction was carried out at 60 °C for 18 h. After this time the reaction mixture was diluted with ethyl acetate (200 ml) and water (200 ml). The phases were thoroughly mixed and after separation, the aqueous phase was extracted with ethyl acetate (2 x 100 ml). The combined organic fractions were then washed with brine (100 ml) and then dried over anhydrous magnesium sulfate.

After filtering and concentrating in vacuo, the crude material was purified by column chromatography (EtOAc/MeOH), to afford the title compound (1.08 g, 1.76 mmol, 76%) as a pale orange solid. <sup>1</sup>H NMR (600 MHz, CDCl<sub>3</sub>) δ 8.67 (s, 1H), 8.27 (d, *J* = 4.9 Hz, 1H), 7.87 (s, 1H), 7.32 (d, *J* = 8.5 Hz, 1H), 7.19 (d, *J* = 8.5 Hz, 1H), 7.10 (d, *J* = 5.0 Hz, 1H), 5.34 (s, 2H), 4.54 (t, *J* = 12.3 Hz, 1H), 4.30 (t, *J* = 7.3 Hz, 2H), 4.15 – 4.05 (m, 2H), 3.60 – 3.47 (m, 4H), 2.49 – 2.33 (m, 2H), 1.81 – 1.63 (m, 4H), 1.55 – 1.42 (m, 2H), 0.82 (s, 9H), -0.02 (s, 6H). <sup>13</sup>C NMR (151 MHz, CDCl<sub>3</sub>) δ 152.5, 148.7, 143.5, 143.3, 134.2, 134.2, 130.9, 126.3, 126.2, 122.9, 115.3, 111.2, 104.3, 67.2, 62.1, 50.6, 44.0, 38.5, 29.9, 29.6, 26.6, 25.8, 18.1, -5.6. HRMS calc. for C<sub>29</sub>H<sub>41</sub><sup>79</sup>BrN<sub>5</sub>O<sub>3</sub>Si [M+H]<sup>+</sup>, 614.21566 found, 614.21573

### 3-((5-bromo-1-(4-hydroxybutyl)-1*H*-benzo[*d*]imidazol-2-yl)methyl)-1-(tetrahydro-2*H*-pyran-4-yl)-1,3-dihydro-2*H*-imidazo[4,5-*c*]pyridin-2-one (51)

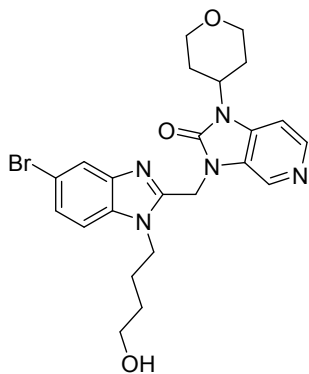

Into a 2 neck round bottom flask containing argon was added 3-[[5-bromo-1-[4-[(*tert*-butyl(dimethyl)silyl]oxybutyl]benzimidazol-2-yl)methyl]-1-tetrahydropyran-4-yl-imidazo[4,5-*c*]pyridin-2-one (500 mg, 0.810 mmol) followed by THF (50 mL), thus forming a clear solution. To this, at room temperature, was added HF-pyridine (1.0 mL, 38 mmol) and the reaction was left to proceed for 3 h, after which time analysis by TLC showed partial conversion of the starting material to a new product. At this point the reaction was quenched by the addition of saturated sodium bicarbonate solution (150 ml) and was further diluted with EtOAc (150 ml). After thoroughly mixing, the phases were separated, and the aqueous phase was extracted with EtOAc (2 x 150 ml). The organic fractions were combined and dried over anhydrous

magnesium sulfate, filtered, and then concentrated in vacuo. The crude material was purified by column chromatography (EtOAc/Hex) to afford the title compound (235 mg, 0.470 mmol, 58%) as well as 216 mg of the starting material. <sup>1</sup>H NMR (600 MHz, DMSO-*d*<sub>6</sub>) δ 8.43 (s, 1H), 8.23 (d, *J* = 5.4 Hz, 1H), 7.81 (d, *J* = 1.9 Hz, 1H), 7.58 (d, *J* = 8.6 Hz, 1H), 7.46 (d, *J* = 5.4 Hz, 1H), 7.39 (dd, *J* = 8.6, 1.9 Hz, 1H), 5.43 (s, 2H), 4.55 – 4.47 (m, 1H), 4.45 (t, *J* = 5.1 Hz, 1H), 4.06 – 3.97 (m, 2H), 3.52 – 3.45 (m, 2H), 3.41 – 3.35 (m, 2H), 3.32 (s, 2H), 2.37 (qd, *J* = 12.4, 4.7 Hz, 2H), 1.74 – 1.62 (m, 4H), 1.47 – 1.39 (m, 2H). <sup>13</sup>C NMR (151 MHz, DMSO-*d*<sub>6</sub>) δ 152.1, 150.3, 143.2, 142.5, 134.4, 134.4, 129.6, 126.5, 125.2, 121.6, 114.0, 112.5, 104.5, 66.4, 60.2, 50.2, 43.4, 37.7, 29.5, 29.4, 26.3. HRMS calc. for C<sub>23</sub>H<sub>27</sub><sup>79</sup>BrN<sub>5</sub>O<sub>3</sub> [M+H]<sup>+</sup>, 500.1292 found, 500.1286. LCMS (ESI) 25–95% MeOH in H<sub>2</sub>O (0.1 % HCO<sub>2</sub>H), 6 min, rt = 3.069, *m/z* = 502.0 C<sub>23</sub>H<sub>27</sub><sup>81</sup>BrN<sub>5</sub>O<sub>3</sub> [M+H]<sup>+</sup>.

## Appendix A

### Protocols for Molecular Modeling

#### Protein preparation

PDB ID 5EA4 was prepared using the protein preparation wizard. Hydrogen atoms were added, protonation states assigned prior to being visually inspected and followed by energy minimization to relieve unfavorable energetic constraints (Schrödinger Release 2018-4: Protein Preparation Wizard; Epik, Schrödinger, LLC, New York, NY, 2016; Impact, Schrödinger, LLC, New York, NY, 2016; Prime, Schrödinger, LLC, New York, NY, 2019). Molecular minimization was first performed on only the hydrogen atoms, followed by an all atom restrained minimization with the heavy atoms set to converge at 0.3Å. The OPLS3 force field was used in all calculations.<sup>4</sup>

#### Molecular overlay

We used the flexible ligand alignment module within the Schrödinger Release 2018-4 to align compound **2**, JNJ-53718678 and BMS-433771 to JNJ-4193390 within the F protein (PDB ID 5EA4). We selected to use the maximum common substructure option as our alignment criteria.

Because of the shared scaffold between our compound series and the similar binding poses observed for resolved JNJ-49153390, JNJ-53718678 and BMS-433771 structures (PDB ID 5EA4, 5EA7 and 5KWW), we assumed a similar binding pose for our compound series. To illustrate the proposed shared binding pose, we performed a molecular overlay and superimposed our most potent compound, compound **2**, JNJ-53718678 and BMS-433771 onto JNJ-49153390 within the PDB ID 5EA4 crystal structure (**Figure S1**). **Figure S1** highlights the proposed binding mode of compound **2** and the expected shared interactions of these inhibitors along the trimeric axis of the central cavity of the F protein is illustrated in **Figure S1**.<sup>5</sup>

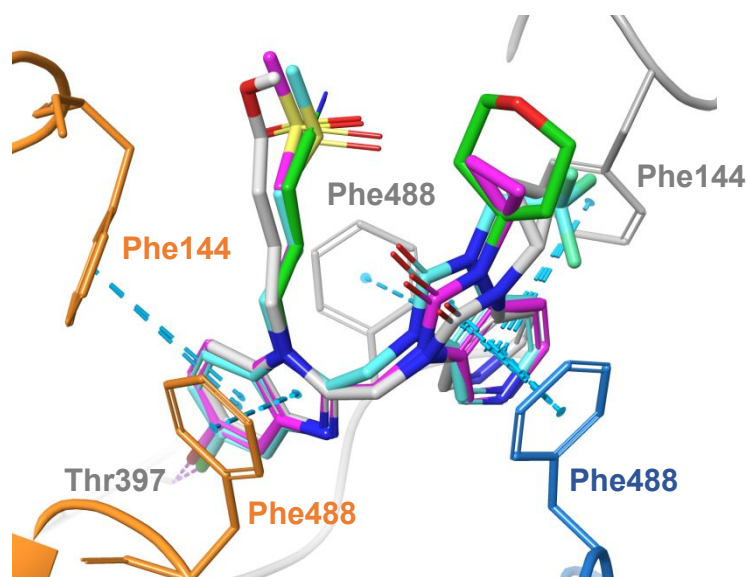

**Figure S1** An illustration comparing the binding poses of compound **2** (green), BMS-433771 (white), JNJ-53718678 (cyan) and JNJ-49153390 (magenta). Blue dashed lines highlight the protein-ligand  $\pi$ - $\pi$  interactions and purple dashed line shows the halogen bond formed with Thr397. The blue, orange and gray cartoons represent the monomer of the trimeric structures.

## Appendix B

| Compound                                       | 1                                                               |
|------------------------------------------------|-----------------------------------------------------------------|
| Formula                                        | C <sub>22</sub> H <sub>24</sub> N <sub>6</sub> O <sub>4</sub> S |
| <i>D</i> <sub>calc.</sub> / g cm <sup>-3</sup> | 1.423                                                           |
| <i>μ</i> /mm <sup>-1</sup>                     | 1.668                                                           |
| Formula Weight                                 | 468.53                                                          |
| Colour                                         | orange                                                          |
| Shape                                          | plate                                                           |
| Size/mm <sup>3</sup>                           | 0.35×0.15×0.05                                                  |
| <i>T</i> /K                                    | 100(2)                                                          |
| Crystal System                                 | monoclinic                                                      |
| Space Group                                    | P2 <sub>1</sub> /c                                              |
| <i>a</i> /Å                                    | 11.2813(5)                                                      |
| <i>b</i> /Å                                    | 11.5366(5)                                                      |
| <i>c</i> /Å                                    | 16.8254(6)                                                      |
| <i>α</i> /°                                    | 90                                                              |
| <i>β</i> /°                                    | 93.222(4)                                                       |
| <i>γ</i> /°                                    | 90                                                              |
| <i>V</i> /Å <sup>3</sup>                       | 2186.33(16)                                                     |
| <i>Z</i>                                       | 4                                                               |
| <i>Z'</i>                                      | 1                                                               |
| Wavelength/Å                                   | 1.54184                                                         |
| Radiation type                                 | CuK <sub>α</sub>                                                |

**Olex2**<sup>7</sup> as the graphical interface. The model was refined with version 2014/7 of **XL**<sup>8</sup> using Least Squares minimisation.

**Crystal Data.** C<sub>22</sub>H<sub>24</sub>N<sub>6</sub>O<sub>4</sub>S, *M<sub>r</sub>* = 468.53, monoclinic, P2<sub>1</sub>/c (No. 14), *a* = 11.2813(5) Å, *b* = 11.5366(5) Å, *c* =

16.8254(6) Å, *β* = 93.222(4)°, *α* = *γ* = 90°, *V* =

2186.33(16) Å<sup>3</sup>, *T* = 100(2) K, *Z* = 4, *Z'* = 1, *μ*(CuK<sub>α</sub>) = 1.668 mm<sup>-1</sup>, 16015 reflections measured, 4120 unique (*R*<sub>int</sub> = 0.0439) which were used in all calculations. The final *wR*<sub>2</sub> was 0.1345

## Crystal Data and Experimental for Compound 1

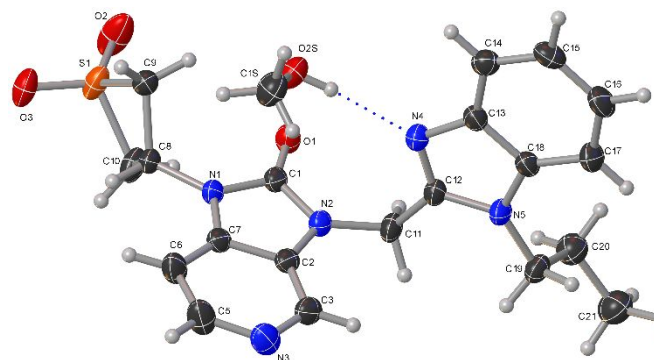

**Experimental.** Single orange plate-shaped crystals of (**1**) were crystallized from methanol and ethyl acetate by. A suitable crystal (0.35×0.15×0.05 mm<sup>3</sup>) was selected and mounted on a loop with paratone oil on a SYNERGY diffractometer. The crystal was cooled to *T* = 100(2) K during data collection. The structure was solved with the **XT**<sup>6</sup> structure solution program using the Intrinsic Phasing solution method and by using

|                                   |        |
|-----------------------------------|--------|
| $\theta_{min}/^\circ$             | 3.925  |
| $\theta_{max}/^\circ$             | 70.063 |
| Measured Refl.                    | 16015  |
| Independent Refl.                 | 4120   |
| Reflections with $I > 2\sigma(I)$ | 3644   |
| $R_{int}$                         | 0.0439 |
| Parameters                        | 344    |
| Restraints                        | 92     |
| Largest Peak                      | 0.399  |
| Deepest Hole                      | -0.505 |
| Goof                              | 1.047  |
| $wR_2$ (all data)                 | 0.1345 |
| $wR_2$                            | 0.1306 |
| $R_1$ (all data)                  | 0.0543 |
| $R_1$                             | 0.0495 |

(all data) and  $R_1$  was 0.0495 ( $I > 2\sigma(I)$ ).

## Structure Quality Indicators

|              |            |       |             |      |          |       |          |       |
|--------------|------------|-------|-------------|------|----------|-------|----------|-------|
| Reflections: | d min (Cu) | 0.82  | I/ $\sigma$ | 18.9 | Rint     | 4.39% | complete | 100%  |
| Refinement:  | Shift      | 0.001 | Max Peak    | 0.4  | Min Peak | -0.5  | Goof     | 1.047 |

A orange plate-shaped crystal with dimensions 0.35×0.15×0.05 mm<sup>3</sup> was mounted on a loop with paratone oil. Data were collected using a SYNERGY diffractometer equipped with an Oxford Cryosystems low-temperature device, operating at  $T = 100(2)$  K.

Data were measured using  $\omega$  scans with a narrow frame width of 0.5° per frame for 3 and 15 s using CuK $\alpha$  radiation (micro-focus sealed X-ray tube, 50 kV, 1.0 mA). The total number of runs and images was based on the strategy calculation from the program CrysAlisPro (Agilent). The maximum resolution that was achieved was  $\theta = 70.063^\circ$ .

The diffraction patterns were indexed using CrysAlisPro (Agilent) and the unit cells were refined using CrysAlisPro (Agilent) on 2920 reflections. Data reduction, scaling and absorption corrections were performed using CrysAlisPro (Agilent) and CrysAlisPro 1.171.39.20a (Rigaku Oxford Diffraction, 2015). A numerical absorption correction based on gaussian integration over a multifaceted crystal model was carried out. An empirical absorption correction using spherical harmonics, as implemented in SCALE3 ABSPACK scaling algorithm was also carried out. The final completeness is 99.9% out to 70.063° in  $\theta$ . The absorption coefficient  $\mu$  of this material is 1.668 mm<sup>-1</sup> at this wavelength ( $\lambda = 1.54184 \text{ \AA}$ ) and the minimum and maximum transmissions are 0.585 and 1.000.

The structure was solved and the space group P2<sub>1</sub>/c (# 14) determined by the **XT**<sup>6</sup> structure solution program using Intrinsic Phasing and refined by Least Squares using version 2014/7 of **XL**<sup>8</sup>. All non-hydrogen atoms were refined anisotropically. Hydrogen atom positions were calculated geometrically and refined using the riding model.

There is a single molecule in the asymmetric unit, which is represented by the reported sum formula. In other words: Z is 4 and Z' is 1.

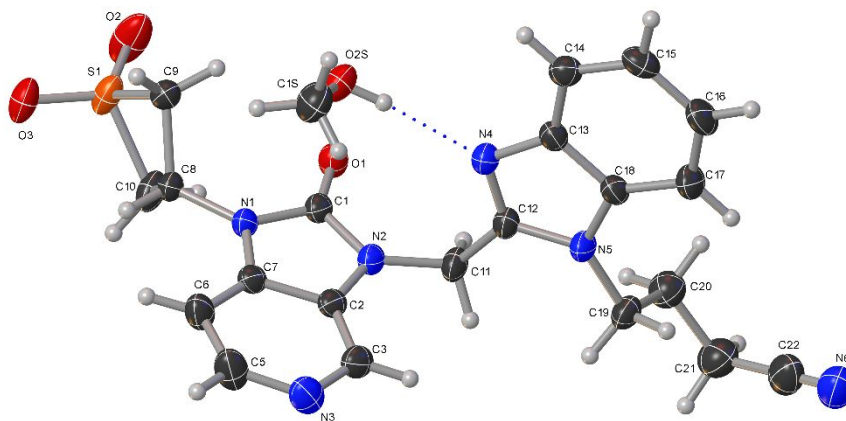

Figure S2:

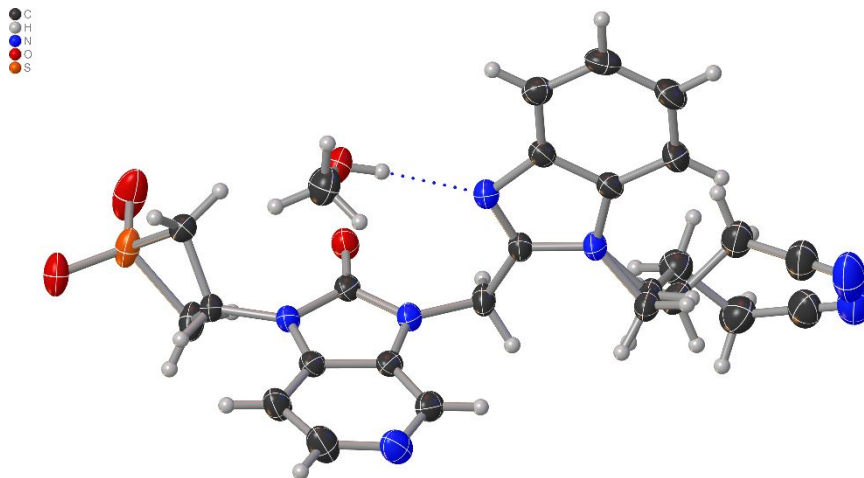

Figure S3:

### Data Plots: Diffraction Data

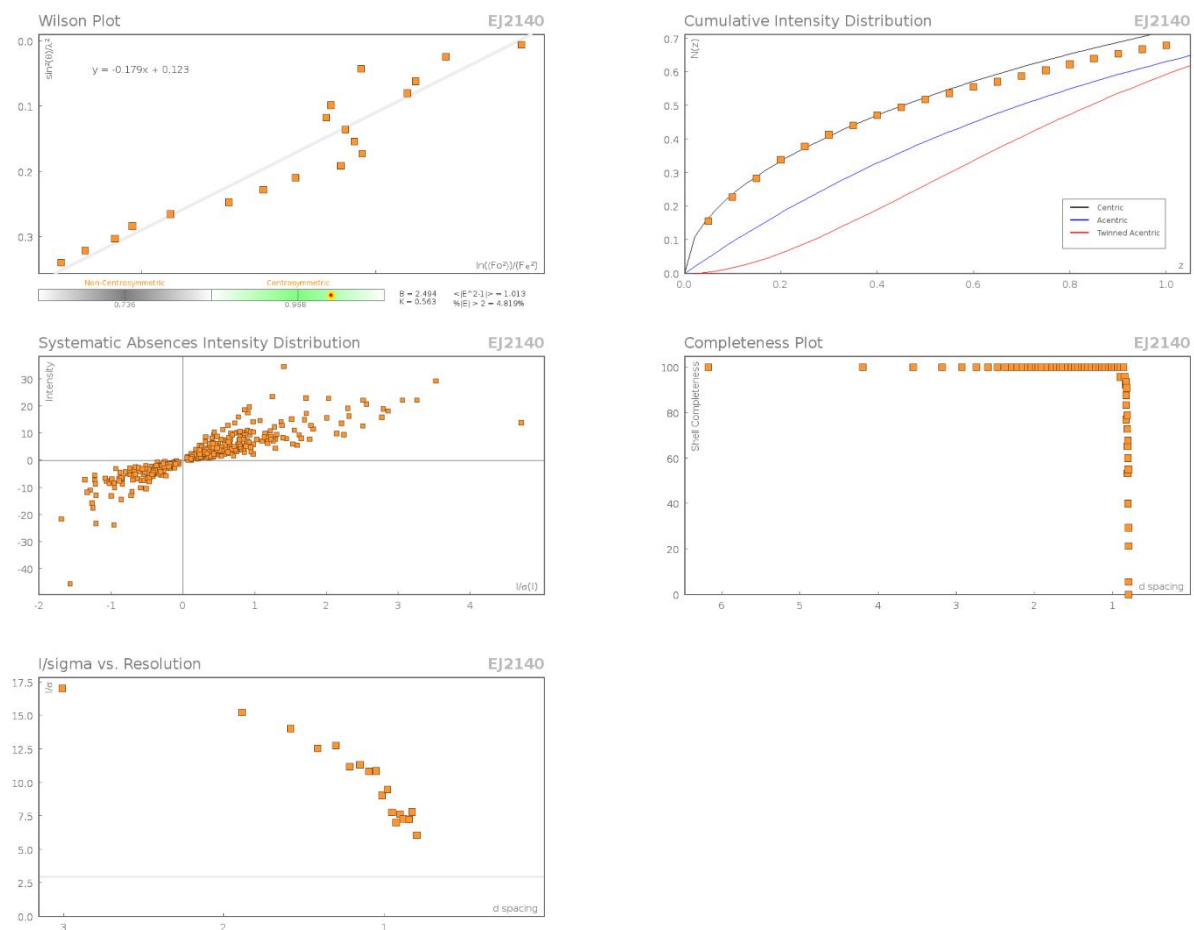



## Data Plots: Refinement and Data

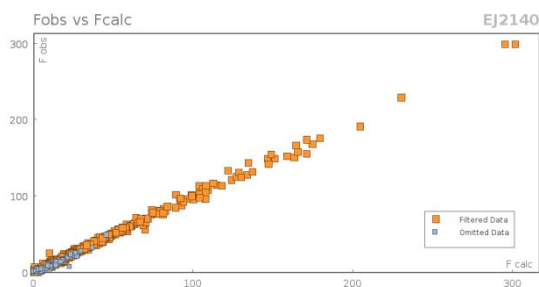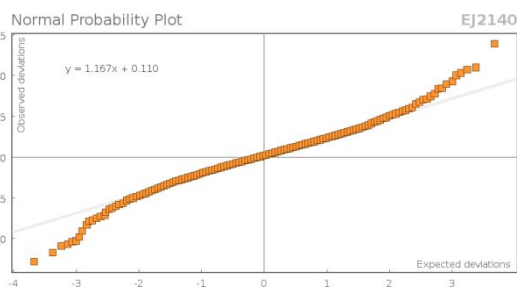

## Reflection Statistics

|                                     |                                   |                            |                 |
|-------------------------------------|-----------------------------------|----------------------------|-----------------|
| Total reflections (after filtering) | 16590                             | Unique reflections         | 4120            |
| Completeness                        | 0.996                             | Mean $I/\sigma$            | 18.85           |
| $hkl_{\max}$ collected              | (13, 13, 20)                      | $hkl_{\min}$ collected     | (-14, -13, -21) |
| $hkl_{\max}$ used                   | (13, 13, 20)                      | $hkl_{\min}$ used          | (-13, 0, 0)     |
| Lim $d_{\max}$ collected            | 20.0                              | Lim $d_{\min}$ collected   | 0.82            |
| $d_{\max}$ used                     | 16.8                              | $d_{\min}$ used            | 0.82            |
| Friedel pairs                       | 2642                              | Friedel pairs merged       | 1               |
| Inconsistent equivalents            | 12                                | $R_{\text{int}}$           | 0.0439          |
| $R_{\text{sigma}}$                  | 0.0338                            | Intensity transformed      | 0               |
| Omitted reflections                 | 0                                 | Omitted by user (OMIT hkl) | 0               |
| Multiplicity                        | (5980, 2576, 1238, 445, 80, 2, 1) | Maximum multiplicity       | 20              |
| Removed systematic absences         | 575                               | Filtered off (Shel/OMIT)   | 455             |

## Images of the Crystal on the Diffractometer

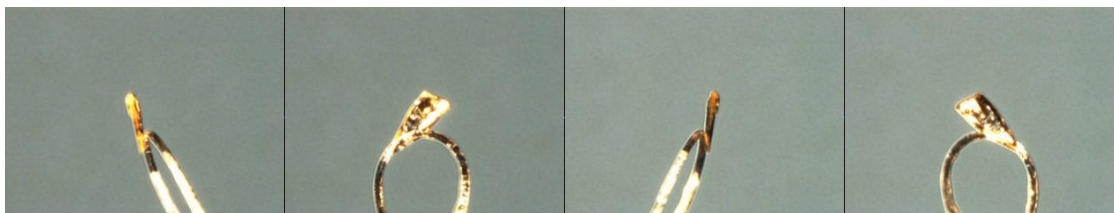

**Table S4:** Fractional Atomic Coordinates ( $\times 10^4$ ) and Equivalent Isotropic Displacement Parameters ( $\text{\AA}^2 \times 10^3$ ) for **1**.  $U_{eq}$  is defined as 1/3 of the trace of the orthogonalised  $U_{ij}$ .

| Atom | x          | y          | z          | $U_{eq}$  |
|------|------------|------------|------------|-----------|
| S1   | 8216.5(4)  | 5688.7(5)  | 5628.0(3)  | 38.16(18) |
| O1   | 5503.7(12) | 5247.1(13) | 4056.7(8)  | 33.0(3)   |
| N1   | 7155.4(14) | 4064.4(14) | 3884.3(9)  | 26.3(4)   |
| O3   | 9358.2(13) | 5398.3(16) | 5998.4(9)  | 43.5(4)   |
| O2S  | 7186.5(14) | 6196.4(14) | 2609.8(9)  | 40.8(4)   |
| N5   | 3520.5(15) | 4450.9(15) | 1343.8(10) | 30.2(4)   |
| N2   | 5568.6(15) | 3828.2(14) | 3070.9(9)  | 28.0(4)   |
| N4   | 5123.4(15) | 5457.2(15) | 1789.4(10) | 28.8(4)   |
| N3   | 7379.0(18) | 1581.4(17) | 2140.4(11) | 42.2(5)   |
| O2   | 7569.1(16) | 6602.5(19) | 5981.7(13) | 63.7(6)   |
| C13  | 4716.3(18) | 5899.8(17) | 1051.3(12) | 28.5(4)   |
| C7   | 7434.4(18) | 3216.4(17) | 3345.5(11) | 28.5(4)   |
| C18  | 3716.1(18) | 5282.7(17) | 771.4(12)  | 29.3(4)   |
| C1   | 6009.8(18) | 4477.4(17) | 3711.2(11) | 27.8(4)   |
| C2   | 6419.3(18) | 3055.5(17) | 2836.5(11) | 28.0(4)   |
| C11  | 4383.3(18) | 3966.1(19) | 2708.5(12) | 31.4(4)   |

| Atom | x          | y          | z          | $U_{eq}$ |
|------|------------|------------|------------|----------|
| C12  | 4384.4(17) | 4618.4(17) | 1937.5(12) | 28.6(4)  |
| C17  | 3111(2)    | 5543(2)    | 47.8(13)   | 39.6(5)  |
| C15  | 4557(2)    | 7078.2(19) | -103.0(13) | 37.8(5)  |
| C3   | 6415(2)    | 2222.1(19) | 2251.0(12) | 34.8(5)  |
| C8   | 7929.0(17) | 4440.7(17) | 4552.0(11) | 26.9(4)  |
| C14  | 5161.5(19) | 6811.0(18) | 612.4(12)  | 32.6(4)  |
| C5   | 8351(2)    | 1778(2)    | 2613.2(14) | 45.3(6)  |
| C6   | 8437(2)    | 2579(2)    | 3235.0(13) | 37.9(5)  |
| C9   | 8279.9(19) | 5736.0(18) | 4566.8(13) | 33.3(5)  |
| C10  | 7386(2)    | 4411(2)    | 5376.1(12) | 37.9(5)  |
| C1S  | 8100(2)    | 5791(2)    | 2150.3(16) | 46.5(6)  |
| C16  | 3554(2)    | 6448(2)    | -380.2(13) | 42.6(5)  |
| C19  | 2524(3)    | 3635(4)    | 1335(4)    | 34.4(6)  |
| C20  | 1426(4)    | 4130(4)    | 1706(3)    | 43.4(11) |
| C21  | 372(4)     | 3296(4)    | 1617(3)    | 52.0(11) |
| C22  | -42(4)     | 3164(5)    | 775(3)     | 53.4(13) |
| N6   | -307(5)    | 3057(5)    | 121(3)     | 59.4(12) |
| C19' | 2734(4)    | 3445(3)    | 1233(4)    | 34.4(6)  |
| C20' | 1578(4)    | 3624(4)    | 1648(3)    | 39.2(11) |
| C21' | 713(4)     | 4405(4)    | 1161(3)    | 44.9(11) |
| C22' | 334(5)     | 3859(5)    | 396(3)     | 52.9(13) |
| N6'  | 108(5)     | 3433(6)    | -200(3)    | 69.9(15) |

**Table S5:** Anisotropic Displacement Parameters ( $\times 10^4$ ) **1**. The anisotropic displacement factor exponent takes the form:  $-2\pi^2[h^2a^{*2} \times U_{11} + \dots + 2hka^* \times b^* \times U_{12}]$

| Atom | $U_{11}$ | $U_{22}$ | $U_{33}$ | $U_{23}$  | $U_{13}$  | $U_{12}$ |
|------|----------|----------|----------|-----------|-----------|----------|
| S1   | 26.0(3)  | 50.6(4)  | 37.4(3)  | -18.3(2)  | -2.5(2)   | -0.1(2)  |
| O1   | 31.6(7)  | 35.7(8)  | 31.0(7)  | -3.0(6)   | -3.0(6)   | 3.7(6)   |
| N1   | 28.7(8)  | 25.7(8)  | 23.8(8)  | -0.7(6)   | -5.4(6)   | 1.0(7)   |
| O3   | 28.3(8)  | 65.6(11) | 35.6(8)  | -11.0(7)  | -5.5(6)   | -2.6(7)  |
| O2S  | 37.4(8)  | 47.1(9)  | 37.4(8)  | -6.7(7)   | -3.6(7)   | -9.7(7)  |
| N5   | 31.6(8)  | 31.5(9)  | 26.3(8)  | 3.4(6)    | -8.3(6)   | -4.5(7)  |
| N2   | 29.0(8)  | 29.7(8)  | 24.8(8)  | 1.5(7)    | -4.1(6)   | -1.3(7)  |
| N4   | 28.2(8)  | 31.4(9)  | 26.4(8)  | -0.3(7)   | -3.1(7)   | -0.6(7)  |
| N3   | 53.7(12) | 40.4(10) | 31.6(9)  | -6.6(8)   | -5.7(8)   | 7.7(9)   |
| O2   | 38.4(9)  | 79.1(14) | 73.5(13) | -46.5(11) | 1.2(9)    | 6.7(9)   |
| C13  | 30.7(10) | 26.6(10) | 27.8(10) | 0.5(8)    | -1.9(8)   | 3.3(8)   |
| C7   | 35.6(11) | 25.6(9)  | 23.7(9)  | 3.0(7)    | -3.8(8)   | -0.7(8)  |
| C18  | 33.5(10) | 26.0(9)  | 27.8(10) | 1.5(8)    | -3.5(8)   | 2.7(8)   |
| C1   | 30.8(10) | 27.4(10) | 24.7(9)  | 2.7(8)    | -3.6(8)   | -1.8(8)  |
| C2   | 35.2(11) | 25.6(9)  | 22.7(9)  | 4.0(7)    | -3.1(8)   | -2.7(8)  |
| C11  | 28.2(10) | 38.8(11) | 26.3(10) | 2.1(8)    | -5.7(8)   | -5.1(8)  |
| C12  | 27.2(10) | 30.3(10) | 27.5(10) | -1.4(8)   | -4.7(8)   | 0.2(8)   |
| C17  | 44.1(13) | 38.8(12) | 34.2(11) | 6.6(9)    | -13.3(10) | -2.2(10) |
| C15  | 50.0(13) | 28.1(10) | 35.6(11) | 6.9(9)    | 5.5(10)   | 4.7(9)   |

| Atom | $U_{11}$ | $U_{22}$ | $U_{33}$ | $U_{23}$  | $U_{13}$  | $U_{12}$ |
|------|----------|----------|----------|-----------|-----------|----------|
| C3   | 44.0(12) | 33.6(11) | 26.1(10) | -0.1(8)   | -5.0(9)   | -2.7(9)  |
| C8   | 27.6(10) | 27.8(10) | 24.5(9)  | -0.7(7)   | -5.7(8)   | -1.0(8)  |
| C14  | 36.0(11) | 28.7(10) | 33.2(10) | -1.1(8)   | 2.0(9)    | -0.1(8)  |
| C5   | 50.3(14) | 48.0(14) | 36.6(12) | -8.9(10)  | -5.8(10)  | 16.3(11) |
| C6   | 41.5(12) | 38.8(12) | 32.2(11) | -3.1(9)   | -8.4(9)   | 8.1(10)  |
| C9   | 34.9(11) | 27.7(10) | 36.4(11) | -1.8(8)   | -6.1(9)   | -0.9(8)  |
| C10  | 32.4(11) | 55.4(14) | 25.4(10) | -1.5(9)   | -3.4(8)   | -9.3(10) |
| C1S  | 36.5(12) | 53.0(15) | 49.9(14) | -4.6(11)  | -0.1(11)  | -5.4(11) |
| C16  | 53.4(14) | 38.5(12) | 34.5(11) | 9.4(9)    | -9.7(10)  | 5.5(11)  |
| C19  | 35.2(10) | 37.4(12) | 29.7(14) | -0.5(11)  | -6.6(9)   | -7.8(10) |
| C20  | 40.8(15) | 44(2)    | 45(2)    | 2.0(19)   | 1.3(14)   | -3.8(14) |
| C21  | 45.2(15) | 50.1(18) | 60.5(16) | -1.2(13)  | 1.4(12)   | -6.2(13) |
| C22  | 42(2)    | 50(3)    | 66.7(17) | -9.6(16)  | -8.4(15)  | 9(2)     |
| N6   | 56(2)    | 55(2)    | 66.0(17) | -9.3(16)  | -14.0(15) | 4.9(19)  |
| C19' | 35.1(10) | 37.4(12) | 29.7(14) | -0.5(11)  | -6.6(9)   | -7.8(10) |
| C20' | 36.0(16) | 37(2)    | 44(2)    | -8.9(17)  | -2.4(13)  | -7.0(15) |
| C21' | 39.9(16) | 46.0(17) | 48.1(16) | -8.7(12)  | -4.6(12)  | 0.7(13)  |
| C22' | 48.6(19) | 54(2)    | 54.3(15) | -12.0(13) | -10.5(13) | 4.7(15)  |
| N6'  | 60(3)    | 81(3)    | 65.7(19) | -30(2)    | -21(2)    | 18(2)    |

**Table S6:** Bond Lengths in Å for **1**.

| Atom | Atom | Length/Å   |
|------|------|------------|
| S1   | O3   | 1.4385(16) |
| S1   | O2   | 1.4310(18) |
| S1   | C9   | 1.792(2)   |
| S1   | C10  | 1.785(2)   |
| O1   | C1   | 1.221(2)   |
| N1   | C7   | 1.382(3)   |
| N1   | C1   | 1.393(3)   |
| N1   | C8   | 1.450(2)   |
| O2S  | C1S  | 1.403(3)   |
| N5   | C18  | 1.386(3)   |
| N5   | C12  | 1.369(2)   |
| N5   | C19  | 1.466(3)   |
| N5   | C19' | 1.466(3)   |
| N2   | C1   | 1.382(3)   |
| N2   | C2   | 1.383(3)   |
| N2   | C11  | 1.447(2)   |

| <u>AtomAtomLength/Å</u> |      |          |
|-------------------------|------|----------|
| N4                      | C13  | 1.396(2) |
| N4                      | C12  | 1.310(3) |
| N3                      | C3   | 1.337(3) |
| N3                      | C5   | 1.337(3) |
| C13                     | C18  | 1.394(3) |
| C13                     | C14  | 1.394(3) |
| C7                      | C2   | 1.403(3) |
| C7                      | C6   | 1.371(3) |
| C18                     | C17  | 1.395(3) |
| C2                      | C3   | 1.376(3) |
| C11                     | C12  | 1.500(3) |
| C17                     | C16  | 1.379(3) |
| C15                     | C14  | 1.385(3) |
| C15                     | C16  | 1.402(3) |
| C8                      | C9   | 1.546(3) |
| C8                      | C10  | 1.547(3) |
| C5                      | C6   | 1.395(3) |
| C19                     | C20  | 1.529(5) |
| C20                     | C21  | 1.531(5) |
| C21                     | C22  | 1.474(5) |
| C22                     | N6   | 1.132(5) |
| C19'                    | C20' | 1.528(5) |
| C20'                    | C21' | 1.531(5) |
| C21'                    | C22' | 1.474(5) |
| C22'                    | N6'  | 1.133(5) |

**Table S7:** Bond Angles in ° for **1**.

| <u>AtomAtomAtom Angle/°</u> |     |      |            |
|-----------------------------|-----|------|------------|
| O3                          | S1  | C9   | 110.73(10) |
| O3                          | S1  | C10  | 110.84(11) |
| O2                          | S1  | O3   | 117.18(11) |
| O2                          | S1  | C9   | 116.22(12) |
| O2                          | S1  | C10  | 115.71(11) |
| C10                         | S1  | C9   | 80.70(10)  |
| C7                          | N1  | C1   | 110.35(16) |
| C7                          | N1  | C8   | 124.82(16) |
| C1                          | N1  | C8   | 124.80(16) |
| C18                         | N5  | C19  | 126.2(3)   |
| C18                         | N5  | C19' | 125.4(3)   |
| C12                         | N5  | C18  | 105.93(16) |
| C12                         | N5  | C19  | 127.7(3)   |
| C12                         | N5  | C19' | 127.2(3)   |
| C1                          | N2  | C2   | 110.26(16) |
| C1                          | N2  | C11  | 123.57(17) |
| C2                          | N2  | C11  | 126.17(16) |
| C12                         | N4  | C13  | 104.97(16) |
| C3                          | N3  | C5   | 118.03(19) |
| C18                         | C13 | N4   | 109.47(17) |
| C18                         | C13 | C14  | 121.00(18) |
| C14                         | C13 | N4   | 129.53(19) |
| N1                          | C7  | C2   | 106.61(17) |
| C6                          | C7  | N1   | 133.54(19) |
| C6                          | C7  | C2   | 119.84(19) |

| <u>AtomAtomAtom Angle/°</u> |     |     |            |
|-----------------------------|-----|-----|------------|
| N5                          | C18 | C13 | 106.05(17) |
| N5                          | C18 | C17 | 131.8(2)   |
| C13                         | C18 | C17 | 122.18(19) |
| O1                          | C1  | N1  | 127.06(18) |
| O1                          | C1  | N2  | 127.45(19) |
| N2                          | C1  | N1  | 105.49(17) |
| N2                          | C2  | C7  | 107.23(17) |
| C3                          | C2  | N2  | 132.79(19) |
| C3                          | C2  | C7  | 119.97(19) |
| N2                          | C11 | C12 | 111.97(16) |
| N5                          | C12 | C11 | 121.67(18) |
| N4                          | C12 | N5  | 113.57(17) |
| N4                          | C12 | C11 | 124.51(18) |
| C16                         | C17 | C18 | 116.4(2)   |
| C14                         | C15 | C16 | 121.5(2)   |
| N3                          | C3  | C2  | 121.0(2)   |
| N1                          | C8  | C9  | 116.39(16) |
| N1                          | C8  | C10 | 115.86(17) |
| C9                          | C8  | C10 | 96.97(16)  |
| C15                         | C14 | C13 | 116.99(19) |
| N3                          | C5  | C6  | 125.3(2)   |
| C7                          | C6  | C5  | 115.7(2)   |
| C8                          | C9  | S1  | 87.82(13)  |
| C8                          | C10 | S1  | 88.00(13)  |
| C17                         | C16 | C15 | 121.9(2)   |

| Atom | Atom | Atom | Angle/°  |
|------|------|------|----------|
| N5   | C19  | C20  | 113.2(3) |
| C19  | C20  | C21  | 111.6(3) |
| C22  | C21  | C20  | 111.2(3) |
| N6   | C22  | C21  | 176.9(6) |
| N5   | C19' | C20' | 111.1(3) |

| Atom | Atom | Atom | Angle/°  |
|------|------|------|----------|
| C19' | C20' | C21' | 111.7(3) |
| C22' | C21' | C20' | 111.2(3) |
| N6'  | C22' | C21' | 176.1(6) |

**Table S8:** Hydrogen Fractional Atomic Coordinates ( $\times 10^4$ ) and Equivalent Isotropic Displacement Parameters ( $\text{\AA}^2 \times 10^3$ ) for **1**.  $U_{eq}$  is defined as 1/3 of the trace of the orthogonalised  $U_{ij}$ .

| Atom     | x            | y  | $zU_{eq}$ |
|----------|--------------|----|-----------|
| H2S      | 654260262390 | 62 |           |
| H11A     | 389743783074 | 39 |           |
| H11B     | 403232072614 | 39 |           |
| H17      | 24425128-136 | 48 |           |
| H15      | 48237688-408 | 46 |           |
| H3       | 573121031927 | 42 |           |
| H8       | 865139704574 | 33 |           |
| H14      | 58327222 792 | 40 |           |
| H5       | 902513442519 | 55 |           |
| H6       | 913126743554 | 46 |           |
| H9A      | 769062424306 | 41 |           |
| H9B      | 906358884386 | 41 |           |
| H10A     | 761637405695 | 46 |           |
| H10B     | 653245245355 | 46 |           |
| H1SA     | 833063911797 | 71 |           |
| H1SB     | 782851281848 | 71 |           |
| H1SC     | 877155752497 | 71 |           |
| H16      | 31766649-866 | 52 |           |
| H19A     | 277329411614 | 41 |           |
| H19B     | 23123428 784 | 41 |           |
| H20A     | 160942612265 | 53 |           |
| H20B     | 120948501455 | 53 |           |
| H21A     | 597 25441833 | 58 |           |
| H21B-273 | 35931917     | 58 |           |
| H19C     | 314327611459 | 41 |           |
| H19D     | 25743306 672 | 41 |           |
| H20C     | 175439662159 | 58 |           |
| H20D     | 121228761717 | 58 |           |
| H21C     | 28 45451465  | 53 |           |
| H21D     | 109551381064 | 53 |           |

**Table S9:** Atomic Occupancies for all atoms that are not fully occupied in **1**.

| Atom | Occupancy | Atom | Occupancy | Atom | Occupancy |
|------|-----------|------|-----------|------|-----------|
| C19  | 0.511(4)  | H21B | 0.511(4)  | H21C | 0.489(4)  |
| C20  | 0.511(4)  | C19' | 0.489(4)  | H21D | 0.489(4)  |
| C21  | 0.511(4)  | C20' | 0.489(4)  |      |           |
| C22  | 0.511(4)  | C21' | 0.489(4)  |      |           |
| N6   | 0.511(4)  | C22' | 0.489(4)  |      |           |
| H19A | 0.511(4)  | N6'  | 0.489(4)  |      |           |
| H19B | 0.511(4)  | H19C | 0.489(4)  |      |           |
| H20A | 0.511(4)  | H19D | 0.489(4)  |      |           |
| H20B | 0.511(4)  | H20C | 0.489(4)  |      |           |
| H21A | 0.511(4)  | H20D | 0.489(4)  |      |           |

## References

1. Yan, D.; Weisshaar, M.; Lamb, K.; Chung, H. K.; Lin, M. Z.; Plemper, R. K., Replication-competent influenza virus and respiratory syncytial virus luciferase reporter strains engineered for co-infections identify antiviral compounds in combination screens. *Biochemistry* **2015**, *54*, 5589-5604.
2. Yan, D.; Lee, S.; Thakkar, V. D.; Luo, M.; Moore, M. L.; Plemper, R. K., Cross-resistance mechanism of respiratory syncytial virus against structurally diverse entry inhibitors. *Proc. Natl. Acad. Sci. USA* **2014**, *111*, E3441-E3449.
3. Hotard, A. L.; Shaikh, F. Y.; Lee, S.; Yan, D.; Teng, M. N.; Plemper, R. K.; Crowe, J. E., Jr.; Moore, M. L., A stabilized respiratory syncytial virus reverse genetics system amenable to recombination-mediated mutagenesis. *Virology* **2012**, *434*, 129-136.
4. Harder, E.; Damm, W.; Maple, J.; Wu, C.; Reboul, M.; Xiang, J. Y.; Wang, L.; Lupyan, D.; Dahlgren, M. K.; Knight, J. L.; Kaus, J. W.; Cerutti, D. S.; Krilov, G.; Jorgensen, W. L.; Abel, R.; Friesner, R. A., Opls3: A force field providing broad coverage of drug-like small molecules and proteins. *Journal of Chemical Theory and Computation* **2016**, *12*, 281-296.
5. Roymans, D.; Alnajjar, S. S.; Battles, M. B.; Sitthicharoenchai, P.; Furmanova-Hollenstein, P.; Rigaux, P.; Berg, J. V. D.; Kwanten, L.; Ginderen, M. V.; Verheyen, N.; Vranckx, L.; Jaensch, S.; Arnoult, E.; Voorzaat, R.; Gallup, J. M.; Larios-Mora, A.; Crabbe, M.; Huntjens, D.; Raboisson, P.; Langedijk, J. P.; Ackermann, M. R.; McLellan, J. S.; Vendeuvre, S.; Koul, A., Therapeutic efficacy of a respiratory syncytial virus fusion inhibitor. *Nat. Commun.* **2017**, *8*, 167.
6. Sheldrick, G. M., Shelxt - integrated space-group and crystal-structure determination. *Acta crystallographica. Section A, Foundations and advances* **2015**, *71*, 3-8.
7. Dolomanov, O. V.; Bourhis, L. J.; Gildea, R. J.; Howard, J. a. K.; Puschmann, H., Olex2: A complete structure solution, refinement and analysis program. *Journal of Applied Crystallography* **2009**, *42*, 339-341.
8. Sheldrick, G. M., A short history of shelx. *Acta crystallographica. Section A, Foundations of crystallography* **2008**, *64*, 112-122.
